# Supplementary material for: Lysosome-targeting chimaeras for degradation of extracellular proteins
Source: Springer Nature journal article supplement (doi:10.1038/s41586-020-2545-9), 2020-07-29
Supplement: MOESM4 [file 41586_2020_2545_MOESM4_ESM%20(1).xlsx]

## Sheet: Sheet1
Gene ID	Num	Positive selection score	pos|score	pos|p-value	pos|fdr	pos|rank	pos|goodsgrna
EXOC2	5	12.0931	8.07e-13	2.65e-07	0.00033	1	5
IGF2R	5	10.4067	3.92e-11	2.65e-07	0.00033	2	5
EXOC1	5	10.1851	6.53e-11	2.65e-07	0.00033	3	4
WDR7	5	9.83268	1.47e-10	2.65e-07	0.00033	4	5
C17orf49	11	9.44009	3.63e-10	2.65e-07	0.00033	5	5
ATP6AP2	5	9.24033	5.75e-10	2.65e-07	0.00033	6	5
SEC22B	4	9.09474	8.04e-10	2.65e-07	0.00033	7	4
ZW10	5	9.02091	9.53e-10	2.65e-07	0.00033	8	4
ATP6AP1	5	8.23582	5.81e-09	2.65e-07	0.00033	9	4
CCDC22	5	7.8962	1.27e-08	2.65e-07	0.00033	10	4
ATP6V1C1	5	7.88606	1.3e-08	2.65e-07	0.00033	11	5
CSNK2B	5	7.82391	1.5e-08	2.65e-07	0.00033	12	5
VPS8	5	7.41567	3.84e-08	2.65e-07	0.00033	13	5
C15orf57	5	7.39362	4.04e-08	2.65e-07	0.00033	14	5
ASNA1	5	7.35458	4.42e-08	2.65e-07	0.00033	15	5
VPS45	5	6.60555	2.48e-07	7.96e-07	0.000928	16	4
ASCC3	5	6.40782	3.91e-07	1.33e-06	0.001179	17	4
TGFBRAP1	5	6.40012	3.98e-07	1.33e-06	0.001179	18	4
MBTPS2	5	6.38934	4.08e-07	1.33e-06	0.001179	19	4
ATP6V1G1	5	6.37779	4.19e-07	1.33e-06	0.001179	20	3
NMNAT1	5	6.32883	4.69e-07	1.33e-06	0.001179	21	5
ALG14	5	6.2993	5.02e-07	1.86e-06	0.001575	22	5
RFT1	5	6.16813	6.79e-07	2.39e-06	0.001856	23	4
ANKFY1	5	6.14146	7.22e-07	2.39e-06	0.001856	24	4
LEO1	5	5.91364	1.22e-06	3.98e-06	0.00297	25	3
VPS16	5	5.8962	1.27e-06	4.51e-06	0.003117	26	4
MIS18BP1	5	5.86967	1.35e-06	4.51e-06	0.003117	27	5
VPS11	5	5.83565	1.46e-06	5.57e-06	0.003713	28	4
ATP6V1A	5	5.78781	1.63e-06	6.1e-06	0.003926	29	5
ZFYVE20	5	5.74473	1.8e-06	6.63e-06	0.003992	30	4
SPTLC2	5	5.7122	1.94e-06	6.63e-06	0.003992	31	4
ALG13	5	5.67366	2.12e-06	7.16e-06	0.00405	32	4
EXOC3	5	5.66354	2.17e-06	7.16e-06	0.00405	33	4
VMA21	5	5.383	4.14e-06	1.83e-05	0.010042	34	3
RABGGTB	5	5.37882	4.18e-06	1.88e-05	0.010042	35	5
COMMD10	5	5.32057	4.78e-06	1.99e-05	0.010314	36	5
REXO2	5	5.27819	5.27e-06	2.31e-05	0.01164	37	5
DBR1	5	4.97062	1.07e-05	4.86e-05	0.023229	38	5
BTF3	5	4.96658	1.08e-05	4.86e-05	0.023229	39	4
EXOC4	5	4.89279	1.28e-05	5.39e-05	0.025124	40	3
TRAPPC3	5	4.84164	1.44e-05	6.08e-05	0.02765	41	2
TRAPPC13	5	4.81248	1.54e-05	6.39e-05	0.028406	42	4
CAMLG	5	4.72354	1.89e-05	8.15e-05	0.035344	43	3
ATP6V0A1	5	4.70997	1.95e-05	8.41e-05	0.035666	44	4
C16orf62	5	4.67985	2.09e-05	8.89e-05	0.036483	45	5
RINT1	5	4.67778	2.1e-05	9e-05	0.036483	46	3
CCDC93	5	4.64589	2.26e-05	0.00010003	0.039709	47	3
PI4KB	6	4.6038	2.49e-05	0.00012816	0.048416	48	5
CLTC	5	4.55284	2.8e-05	0.00012604	0.048416	49	3
PPCS	5	4.54212	2.87e-05	0.00012975	0.048416	50	4
CPD	5	4.52578	2.98e-05	0.00013771	0.0496	51	4
SEC61B	5	4.52433	2.99e-05	0.00013824	0.0496	52	4
SLC35B1	5	4.50724	3.11e-05	0.00014302	0.050346	53	4
GPATCH2L	5	4.48678	3.26e-05	0.00015257	0.051845	54	4
ATP6V0C	5	4.48413	3.28e-05	0.00015284	0.051845	55	4
TAF2	5	4.42136	3.79e-05	0.0001807	0.059319	56	5
AP3B1	5	4.4168	3.83e-05	0.00018123	0.059319	57	3
CLTA	5	4.39469	4.03e-05	0.00019397	0.062393	58	5
PPCDC	10	4.37469	4.22e-05	0.00025659	0.07441	59	5
RAD9B	7	4.36151	4.35e-05	0.00023483	0.071823	60	4
ATP6V1B2	5	4.31785	4.81e-05	0.00022899	0.071823	61	5
SLC25A34	5	4.29073	5.12e-05	0.00024226	0.072529	62	5
YLPM1	5	4.28483	5.19e-05	0.00024491	0.072529	63	4
PPP2R2A	5	4.26122	5.48e-05	0.00025924	0.07441	64	3
AP2A1	5	4.24185	5.73e-05	0.00026667	0.075383	65	3
TRAPPC11	5	4.21968	6.03e-05	0.00027728	0.077213	66	3
RBM14-RBM4	6	4.20343	6.26e-05	0.00028471	0.078116	67	5
AK9	4	4.1945	6.39e-05	0.00023217	0.071823	68	3
COPS2	5	4.16813	6.79e-05	0.00031019	0.083871	69	4
NAMPT	5	4.15739	6.96e-05	0.00031708	0.084512	70	3
GDI2	10	4.14026	7.24e-05	0.0004333	0.102707	71	5
PMVK	5	4.13966	7.25e-05	0.00032929	0.085465	72	3
DENND1A	5	4.13727	7.29e-05	0.00032982	0.085465	73	5
TMTC4	5	4.11407	7.69e-05	0.00034521	0.087704	74	2
PNISR	9	4.11182	7.73e-05	0.0004349	0.102707	75	5
EXOC7	5	4.11126	7.74e-05	0.00034786	0.087704	76	4
PDZD4	5	4.09583	8.02e-05	0.00035689	0.088779	77	2
IER3IP1	5	4.08884	8.15e-05	0.00036219	0.088913	78	4
NAPG	5	4.0511	8.89e-05	0.00038767	0.093931	79	4
GOSR1	5	3.98343	0.00010389	0.0004418	0.103032	80	4
PPP2R1A	10	3.94658	0.00011309	0.00065619	0.14403	81	4
COMMD6	10	3.91371	0.00012198	0.00071563	0.153465	82	5
TTLL10	9	3.87047	0.00013475	0.00073898	0.154912	83	1
IER3	5	3.85146	0.00014078	0.00057553	0.13143	84	4
GDF5	5	3.84958	0.00014139	0.00057765	0.13143	85	3
CCDC115	5	3.82258	0.00015046	0.00062011	0.139389	86	3
DCN	10	3.81071	0.00015463	0.00088333	0.173476	87	6
EXOSC2	5	3.8022	0.00015769	0.0006477	0.143859	88	4
TRAPPC1	5	3.74948	0.00017804	0.00072518	0.153747	89	3
DNM2	4	3.74088	0.0001816	0.00068379	0.148342	90	3
CREBBP	5	3.70355	0.0001979	0.00078462	0.162651	91	3
COG1	5	3.69007	0.00020414	0.00080531	0.164819	92	4
SLITRK6	5	3.68474	0.00020666	0.00081274	0.164819	93	3
COL4A3BP	5	3.67714	0.00021031	0.00082707	0.165921	94	4
OR10C1	5	3.64774	0.00022504	0.00087696	0.173476	95	3
CYP39A1	5	3.62806	0.00023547	0.00091039	0.176929	96	2
GOLT1B	5	3.62028	0.00023973	0.00092737	0.178371	97	4
REXO4	5	3.56925	0.00026962	0.001042	0.198373	98	4
EMC2	5	3.56149	0.00027448	0.0010585	0.19947	99	3
PET100	5	3.54867	0.0002827	0.0010951	0.20297	100	3
TFAP4	5	3.54693	0.00028384	0.0010988	0.20297	101	4
MED14	5	3.5204	0.00030172	0.0011736	0.212775	102	4
VPS35	5	3.49701	0.00031841	0.0012288	0.217775	103	2
EXOC5	5	3.49398	0.00032064	0.0012352	0.217775	104	3
COMMD2	5	3.49298	0.00032138	0.0012373	0.217775	105	4
RNF40	4	3.49214	0.000322	0.0011747	0.212775	106	2
C19orf48	5	3.48895	0.00032438	0.0012516	0.218238	107	3
EMC1	5	3.45986	0.00034685	0.0013333	0.228222	108	2
SYS1	4	3.44691	0.00035735	0.0013058	0.225568	109	4
RABGGTA	5	3.43548	0.00036688	0.0013986	0.237219	110	2
CCRL2	5	3.42704	0.00037408	0.0014214	0.238917	111	3
COMMD4	5	3.4071	0.00039165	0.0014878	0.247834	112	4
ZNF346	5	3.38568	0.00041145	0.0015663	0.258609	113	3
APOBEC2	5	3.37806	0.00041874	0.0015891	0.260075	114	2
FASTK	5	3.37246	0.00042417	0.0016146	0.261946	115	1
VPS41	10	3.36125	0.00043526	0.0022557	0.32837	116	3
ZBTB5	5	3.36103	0.00043548	0.0016592	0.266857	117	2
CMTR2	5	3.35847	0.00043806	0.001674	0.266946	118	4
EPS8L2	5	3.35457	0.00044201	0.0016894	0.267117	119	2
SFSWAP	5	3.33661	0.00046067	0.0017542	0.275023	120	4
SEC61G	5	3.32416	0.00047407	0.0018067	0.280899	121	4
KIAA1033	5	3.31228	0.00048721	0.0018497	0.285206	122	4
TGFBR3L	5	3.30783	0.00049223	0.0018688	0.28579	123	3
SPATA8	5	3.29323	0.00050906	0.0019378	0.293931	124	3
VPS4A	5	3.27421	0.00053185	0.0020084	0.30218	125	4
SPIDR	5	3.24524	0.00056854	0.0021373	0.31901	126	4
PRIMA1	5	3.2412	0.00057385	0.0021607	0.319936	127	2
DPH6	5	3.231	0.00058749	0.0022069	0.324199	128	3
PCCA	5	3.21504	0.00060948	0.0022796	0.32837	129	3
ST8SIA4	5	3.2137	0.00061137	0.002288	0.32837	130	2
SMARCE1	5	3.19856	0.00063306	0.0023692	0.334871	131	2
KLHL36	10	3.19227	0.00064229	0.0032629	0.381095	132	4
COPS4	5	3.18527	0.00065272	0.0024398	0.342254	133	3
QARS	5	3.16306	0.00068697	0.0025592	0.353685	134	4
FUBP3	5	3.1567	0.0006971	0.0025932	0.355744	135	2
SLC35D3	4	3.15579	0.00069857	0.002357	0.334871	136	2
NDRG2	6	3.1508	0.00070664	0.002849	0.36408	137	4
OSGEPL1	5	3.14605	0.00071442	0.0026606	0.35926	138	4
NARFL	5	3.14056	0.0007235	0.0026924	0.35926	139	3
IFI27	5	3.13716	0.00072919	0.0027152	0.35926	140	4
SUGP1	5	3.13625	0.00073071	0.0027221	0.35926	141	4
VPS53	5	3.13453	0.00073362	0.0027344	0.35926	142	2
USE1	4	3.13166	0.00073848	0.0024695	0.343838	143	3
ADAMTS12	5	3.12661	0.00074712	0.0027789	0.362563	144	2
C14orf105	5	3.11358	0.00076988	0.0028612	0.36408	145	4
METAP2	5	3.11309	0.00077075	0.0028633	0.36408	146	3
PRPF31	7	3.11106	0.00077435	0.0033404	0.387092	147	3
TBL3	5	3.10136	0.00079185	0.0029413	0.368297	148	2
DSPP	10	3.09149	0.00081004	0.0040398	0.428246	149	5
NAP1L4	5	3.08446	0.00082326	0.0030477	0.373667	150	1
RHBDL2	10	3.08231	0.00082735	0.0041242	0.431623	151	6
RBBP5	5	3.08217	0.00082762	0.0030639	0.373667	152	4
IMPG2	5	3.07777	0.00083605	0.0030989	0.373667	153	3
ANKRD46	5	3.0768	0.00083791	0.0031042	0.373667	154	3
GNE	5	3.07591	0.00083964	0.0031106	0.373667	155	3
PFN1	4	3.07523	0.00084095	0.0027312	0.35926	156	3
GNRHR	5	3.0655	0.00086	0.0031769	0.37753	157	3
RAB5A	5	3.06118	0.00086861	0.0032014	0.378024	158	2
AKAP3	10	3.05707	0.00087685	0.0043312	0.441568	159	6
VEZF1	5	3.05092	0.00088936	0.0032682	0.381095	160	4
TMEM132B	4	3.05004	0.00089116	0.0028686	0.36408	161	3
RTCB	4	3.04321	0.0009053	0.0029058	0.366303	162	3
H1F0	5	3.03412	0.00092444	0.0033956	0.391059	163	3
SLC39A7	4	3.02826	0.00093701	0.002996	0.37264	164	2
OR5R1	5	3.02805	0.00093746	0.0034407	0.393823	165	2
HIC2	10	3.02695	0.00093983	0.0046278	0.449251	166	3
MRTO4	5	3.02026	0.00095442	0.0035118	0.399511	167	4
APOL2	5	3.01642	0.00096289	0.0035421	0.40051	168	3
AP2S1	5	3.01194	0.00097289	0.0035766	0.401974	169	3
SCFD1	4	3.00515	0.00098822	0.0031244	0.373667	170	3
PUM1	5	3.00512	0.00098828	0.0036413	0.4068	171	3
GFRA1	5	2.99814	0.0010043	0.0036896	0.409742	172	4
UVRAG	5	2.99021	0.0010228	0.0037602	0.413658	173	2
TUBA1B	5	2.98945	0.0010246	0.0037692	0.413658	174	3
MEN1	5	2.98359	0.0010385	0.003827	0.414955	175	3
SRPRB	5	2.98247	0.0010412	0.0038387	0.414955	176	4
COG8	5	2.97428	0.001061	0.0039178	0.420081	177	4
RGPD2	5	2.96952	0.0010727	0.0039581	0.42198	178	2
PRDM13	5	2.95805	0.0011014	0.0040696	0.428959	179	3
SLC27A6	5	2.94935	0.0011237	0.0041444	0.431623	180	3
GKN2	5	2.94608	0.0011322	0.0041741	0.431623	181	2
TPK1	5	2.94474	0.0011357	0.0041874	0.431623	182	3
PREB	5	2.93204	0.0011694	0.0043004	0.440839	183	3
SPCS2	5	2.92017	0.0012018	0.0044124	0.445047	184	3
COMMD8	5	2.91927	0.0012043	0.0044193	0.445047	185	4
LY6K	5	2.91204	0.0012245	0.0044922	0.445047	186	4
CEP128	5	2.9114	0.0012263	0.0044997	0.445047	187	4
PFKP	5	2.91048	0.0012289	0.0045079	0.445047	188	4
DCPS	5	2.91034	0.0012293	0.0045084	0.445047	189	4
LHX8	5	2.90556	0.0012429	0.0045551	0.44729	190	3
NDUFV1	10	2.9041	0.0012471	0.0060076	0.496601	191	1
FAM132B	4	2.89946	0.0012605	0.0038477	0.414955	192	3
SMIM12	5	2.89548	0.0012721	0.0046629	0.449251	193	3
HESX1	10	2.89347	0.001278	0.0061498	0.496601	194	5
CUEDC1	5	2.89225	0.0012816	0.0046936	0.449251	195	4
MPST	5	2.89204	0.0012822	0.0046955	0.449251	196	3
BLOC1S1	5	2.87939	0.0013201	0.0048369	0.457721	197	3
NDUFB2	5	2.8788	0.0013219	0.0048396	0.457721	198	1
DNAJC13	5	2.8728	0.0013403	0.0049059	0.458516	199	3
RHEBL1	5	2.86986	0.0013494	0.0049351	0.458516	200	3
COPB2	5	2.86694	0.0013585	0.00496	0.458516	201	2
PPP1R13B	5	2.86401	0.0013677	0.0049908	0.458516	202	3
TRAPPC5	6	2.8636	0.001369	0.0050662	0.458516	203	4
CNOT4	5	2.86009	0.0013801	0.0050259	0.458516	204	4
ADAMTS6	5	2.85827	0.0013859	0.0050423	0.458516	205	4
SSX3	5	2.85325	0.001402	0.0050943	0.458516	206	3
UQCRB	5	2.85118	0.0014087	0.0051118	0.458516	207	3
CTAGE5	5	2.84897	0.0014159	0.0051431	0.458675	208	3
ATP6V0E2	5	2.84719	0.0014217	0.0051628	0.458675	209	1
ADCY10	5	2.8433	0.0014345	0.0052105	0.460725	210	2
OR10A3	5	2.83917	0.0014482	0.0052525	0.462241	211	3
ATP13A4	5	2.83612	0.0014584	0.0052875	0.463139	212	3
SRP9	5	2.82603	0.0014927	0.0053968	0.470505	213	4
EDA	5	2.82071	0.0015111	0.0054669	0.472199	214	4
STX18	5	2.81776	0.0015214	0.0054982	0.472715	215	3
CCT8	5	2.81415	0.0015341	0.0055396	0.47319	216	2
GTF3C2	5	2.81299	0.0015382	0.0055544	0.47319	217	3
HCN3	5	2.80872	0.0015534	0.0056096	0.47572	218	3
IARS2	4	2.803	0.001574	0.0046814	0.449251	219	3
COG3	5	2.7939	0.0016073	0.0057953	0.489248	220	4
MUC5B	4	2.78537	0.0016392	0.0048576	0.457721	221	3
CLCN7	5	2.78397	0.0016445	0.005928	0.49596	222	2
SEMA5A	5	2.78002	0.0016595	0.0059859	0.496601	223	2
2018-03-04	5	2.77415	0.0016821	0.0060633	0.496601	224	3
VPS18	5	2.76983	0.0016989	0.0061276	0.496601	225	4
OR4N4	5	2.76744	0.0017083	0.0061589	0.496601	226	4
CDH22	5	2.76721	0.0017092	0.0061636	0.496601	227	4
FARSB	4	2.76657	0.0017117	0.0050423	0.458516	228	3
TMPRSS11BNL	5	2.76622	0.0017131	0.0061732	0.496601	229	3
C10orf137	5	2.76429	0.0017207	0.0061976	0.496601	230	2
NOP10	5	2.76409	0.0017215	0.0062019	0.496601	231	4
HRC	5	2.76098	0.0017339	0.0062443	0.497863	232	4
RNF187	10	2.75776	0.0017468	0.0079701	0.573707	233	4
KIAA0226	10	2.75679	0.0017507	0.0079876	0.573707	234	3
CEACAM21	5	2.74978	0.0017792	0.0064109	0.508522	235	2
OAT	5	2.74824	0.0017855	0.0064338	0.508522	236	4
CNTNAP4	5	2.74659	0.0017923	0.0064598	0.508522	237	4
CMTM2	10	2.74613	0.0017942	0.0081463	0.580096	238	3
SERF2	9	2.74338	0.0018056	0.0077504	0.569287	239	4
ERC2	5	2.73983	0.0018204	0.0065707	0.514582	240	1
TBC1D3	5	2.73821	0.0018272	0.0065919	0.514582	241	4
EXOSC9	5	2.73591	0.0018369	0.0066248	0.514995	242	3
EPHB1	5	2.73398	0.0018451	0.0066524	0.514995	243	3
KIAA1244	5	2.73245	0.0018516	0.0066805	0.515036	244	4
NEDD4	4	2.73156	0.0018554	0.0054451	0.472199	245	1
MBD3	5	2.72017	0.0019047	0.0068641	0.525625	246	4
PUS10	5	2.71668	0.0019201	0.0069156	0.5259	247	2
GIMAP2	5	2.71564	0.0019247	0.0069342	0.5259	248	3
DDX17	5	2.7006	0.0019925	0.0071364	0.53491	249	4
SENP1	5	2.69969	0.0019967	0.0071528	0.53491	250	4
SLC7A6	5	2.69797	0.0020046	0.0071852	0.53491	251	3
QSOX2	5	2.69728	0.0020078	0.0071964	0.53491	252	4
WFDC3	4	2.69126	0.0020358	0.0059275	0.49596	253	2
CENPA	10	2.68793	0.0020515	0.0091068	0.61204	254	5
IFNK	5	2.68643	0.0020586	0.0073662	0.54536	255	2
NAGS	10	2.67875	0.0020953	0.0092703	0.613317	256	3
FBN2	5	2.67334	0.0021216	0.0075779	0.558819	257	4
SPRR2G	5	2.65531	0.0022115	0.00789	0.573707	258	2
USP24	5	2.65412	0.0022176	0.0079085	0.573707	259	3
ALG11	5	2.65024	0.0022375	0.0079632	0.573707	260	2
PHF6	5	2.64576	0.0022607	0.008021	0.573707	261	2
ADIG	5	2.6453	0.0022631	0.0080258	0.573707	262	3
SBNO2	10	2.64384	0.0022707	0.0099235	0.631794	263	2
RXRG	5	2.62782	0.002356	0.0082529	0.58324	264	3
SFPQ	5	2.62193	0.0023882	0.0083299	0.586456	265	3
WT1	4	2.62131	0.0023916	0.0068742	0.525625	266	3
CCDC24	5	2.61649	0.0024183	0.0083941	0.588536	267	1
CECR1	10	2.6133	0.0024361	0.010518	0.656297	268	4
FKBP14	5	2.61286	0.0024386	0.0084456	0.588536	269	2
BRF1	5	2.61236	0.0024414	0.0084541	0.588536	270	3
TAAR2	5	2.61004	0.0024545	0.0084918	0.588962	271	3
BET1	5	2.60384	0.0024898	0.0085905	0.593601	272	3
FUT7	4	2.60213	0.0024996	0.007156	0.53491	273	3
UBB	5	2.599	0.0025177	0.00866	0.596197	274	3
VAMP8	9	2.5913	0.0025627	0.010591	0.656442	275	5
ZFPM1	5	2.59044	0.0025678	0.0087953	0.603287	276	3
NDUFS1	5	2.5821	0.0026176	0.0089179	0.609455	277	1
DEDD2	10	2.57687	0.0026493	0.011273	0.674077	278	4
NADK2	5	2.57398	0.002667	0.0090495	0.61204	279	2
CCBL1	5	2.57125	0.0026838	0.0090951	0.61204	280	3
FABP12	5	2.56989	0.0026922	0.0091153	0.61204	281	2
MTMR9	5	2.56886	0.0026986	0.0091259	0.61204	282	2
TCTEX1D2	5	2.56588	0.0027172	0.0091705	0.61204	283	1
PIH1D3	5	2.56506	0.0027223	0.0091854	0.61204	284	3
SCAPER	5	2.56024	0.0027527	0.0092607	0.613317	285	2
FGD4	5	2.55555	0.0027826	0.0093393	0.615698	286	3
HMCN2	5	2.5502	0.0028171	0.0094274	0.619317	287	2
ACADS	5	2.54522	0.0028496	0.0095032	0.620468	288	2
RBMS2	5	2.543	0.0028642	0.0095388	0.620468	289	3
DDN	5	2.54263	0.0028666	0.0095446	0.620468	290	1
FEM1B	5	2.54028	0.0028822	0.0095823	0.620754	291	3
PSMC1	4	2.53804	0.0028971	0.0082179	0.582973	292	2
OR2Z1	5	2.53291	0.0029315	0.0096985	0.626109	293	2
EGLN2	10	2.53091	0.002945	0.012367	0.692907	294	4
LDB1	10	2.52784	0.0029659	0.012442	0.692907	295	3
H2AFB1	5	2.5278	0.0029662	0.0097856	0.629549	296	1
IRX3	5	2.52057	0.003016	0.0099225	0.631794	297	1
AASS	5	2.51981	0.0030213	0.0099363	0.631794	298	3
ASCL4	5	2.51846	0.0030307	0.0099559	0.631794	299	3
PISD	10	2.51711	0.0030401	0.012709	0.699451	300	5
MAPKAP1	10	2.51001	0.0030902	0.012883	0.700733	301	4
IL8	10	2.50307	0.00314	0.013071	0.702756	302	3
CDC16	5	2.49749	0.0031806	0.010338	0.651609	303	3
ZNF267	10	2.49708	0.0031836	0.013223	0.70488	304	3
SLC24A1	10	2.4953	0.0031967	0.013268	0.705269	305	4
SIRT7	5	2.48308	0.0032879	0.010591	0.656442	306	2
TRPM6	5	2.4788	0.0033205	0.01068	0.659776	307	3
BMP15	5	2.47308	0.0033645	0.010778	0.660915	308	1
DBT	5	2.47236	0.0033701	0.01079	0.660915	309	3
PARP10	5	2.47165	0.0033756	0.010804	0.660915	310	2
CEP57	5	2.46081	0.0034609	0.011009	0.669671	311	3
OR10T2	5	2.46042	0.003464	0.011019	0.669671	312	1
IGF2BP3	5	2.45567	0.0035021	0.011111	0.671622	313	3
GDF10	5	2.45448	0.0035117	0.011138	0.671622	314	3
MRPS23	5	2.45363	0.0035186	0.01116	0.671622	315	3
SKA1	5	2.45011	0.0035472	0.011228	0.673602	316	2
PSMD12	4	2.44265	0.0036087	0.010062	0.636332	317	2
VCAN	5	2.44108	0.0036218	0.011408	0.677824	318	3
COL12A1	5	2.43615	0.0036631	0.011514	0.678749	319	2
CARS	5	2.43519	0.0036712	0.011533	0.678749	320	2
UQCRQ	5	2.43029	0.0037129	0.011638	0.68067	321	2
SCAF8	5	2.42698	0.0037413	0.011708	0.682446	322	3
PCDHA4	5	2.4243	0.0037644	0.011767	0.682446	323	3
EDIL3	5	2.42381	0.0037687	0.011778	0.682446	324	3
UBA52	9	2.42374	0.0037693	0.015148	0.747669	325	3
RNASEH2A	5	2.41915	0.0038093	0.011882	0.68631	326	3
KCTD7	5	2.41668	0.0038311	0.011929	0.686912	327	3
EQTN	5	2.41058	0.0038853	0.012061	0.691824	328	3
RCOR3	5	2.40761	0.0039119	0.012128	0.691824	329	3
MGRN1	5	2.40403	0.0039443	0.012203	0.691824	330	2
FARSA	5	2.40361	0.0039481	0.012211	0.691824	331	3
TAF8	5	2.40303	0.0039534	0.012228	0.691824	332	3
ATP6V0D1	5	2.40254	0.0039579	0.012237	0.691824	333	3
FAM178A	5	2.39488	0.0040283	0.012416	0.692907	334	3
MYL12A	10	2.39472	0.0040298	0.016272	0.775018	335	5
B4GALNT3	5	2.39415	0.0040351	0.012435	0.692907	336	3
ISX	5	2.3895	0.0040785	0.012534	0.69542	337	2
CCDC15	5	2.38827	0.0040901	0.012561	0.69542	338	3
IPCEF1	4	2.38576	0.0041138	0.011364	0.677364	339	3
OR8B8	5	2.38243	0.0041454	0.012696	0.699451	340	3
NLK	4	2.37944	0.0041741	0.011512	0.678749	341	3
LDLR	5	2.37923	0.0041761	0.012789	0.700733	342	3
TIMM17B	5	2.37682	0.0041993	0.01285	0.700733	343	3
KRR1	4	2.37666	0.0042009	0.01159	0.679977	344	3
TKT	10	2.37523	0.0042147	0.016947	0.777913	345	4
CASQ1	5	2.37076	0.0042583	0.012996	0.702756	346	2
TRAPPC12	5	2.36956	0.0042701	0.013023	0.702756	347	3
MYO7B	5	2.36876	0.004278	0.013043	0.702756	348	2
FAM194B	5	2.36553	0.0043099	0.013115	0.703098	349	1
HADHA	5	2.36362	0.0043289	0.013156	0.703325	350	3
SRSF11	10	2.36313	0.0043338	0.017397	0.780106	351	2
SRSF7	5	2.34665	0.0045014	0.013604	0.721071	352	3
NAALADL2	4	2.34554	0.0045129	0.01239	0.692907	353	2
CPSF6	5	2.34118	0.0045585	0.01374	0.72618	354	1
GABRA6	5	2.33801	0.0045919	0.013825	0.726441	355	2
SRL	5	2.33646	0.0046083	0.013865	0.726441	356	2
ABCA13	5	2.33286	0.0046467	0.013979	0.726441	357	3
TATDN2	5	2.3318	0.004658	0.014007	0.726441	358	1
SIX5	5	2.33146	0.0046616	0.014014	0.726441	359	3
WDR91	5	2.33085	0.0046682	0.01403	0.726441	360	3
DLST	5	2.32916	0.0046864	0.01408	0.726441	361	3
WISP1	4	2.32873	0.0046911	0.012855	0.700733	362	3
STK31	5	2.32719	0.0047077	0.014134	0.726441	363	1
CDC26	5	2.32191	0.0047653	0.01427	0.72871	364	2
FAM24A	5	2.32114	0.0047737	0.014295	0.72871	365	2
IFRD1	9	2.32094	0.004776	0.018865	0.801947	366	3
EIF4A2	10	2.32027	0.0047833	0.018995	0.801947	367	5
RBM27	5	2.31525	0.0048389	0.014468	0.734758	368	3
SLC25A19	5	2.31435	0.004849	0.014493	0.734758	369	2
BTG4	5	2.31115	0.0048848	0.014587	0.737516	370	3
TRAPPC8	5	2.30723	0.0049291	0.014704	0.738128	371	3
ABI1	5	2.30632	0.0049395	0.014728	0.738128	372	3
CFHR4	5	2.30541	0.0049498	0.014755	0.738128	373	3
BCDIN3D	5	2.30537	0.0049503	0.014757	0.738128	374	2
C4orf33	9	2.29917	0.0050215	0.019777	0.807415	375	4
TOM1	5	2.29866	0.0050274	0.014943	0.74542	376	3
ADSL	5	2.29387	0.0050831	0.01508	0.747669	377	3
RNF214	5	2.29281	0.0050955	0.015106	0.747669	378	2
RBPMS2	5	2.28495	0.0051886	0.015353	0.75306	379	3
WFDC10B	5	2.28406	0.0051992	0.015378	0.75306	380	2
TAS2R40	4	2.28282	0.0052141	0.014218	0.72871	381	2
ARHGEF35	10	2.2783	0.0052687	0.020695	0.81341	382	5
ARIH1	5	2.27536	0.0053044	0.015633	0.763504	383	3
VGLL1	5	2.27133	0.0053539	0.015776	0.768516	384	1
UGT1A10	5	2.26833	0.005391	0.01586	0.769101	385	3
RHPN2	5	2.2679	0.0053964	0.015871	0.769101	386	3
CD59	8	2.26689	0.0054089	0.019287	0.801947	387	3
VPS29	2	2.26502	0.0054323	0.01042	0.654246	388	2
CFHR1	5	2.26265	0.005462	0.016022	0.774419	389	3
IRX1	5	2.2594	0.005503	0.016124	0.775018	390	1
ZNRF3	5	2.25873	0.0055115	0.016144	0.775018	391	3
GYG1	5	2.25642	0.0055409	0.016221	0.775018	392	3
ST7L	5	2.2555	0.0055527	0.016252	0.775018	393	1
KCNC4	5	2.2545	0.0055655	0.016284	0.775018	394	2
CCL26	4	2.25397	0.0055723	0.015135	0.747669	395	2
RSPH10B	10	2.2534	0.0055796	0.021751	0.832252	396	4
LEPREL1	5	2.25281	0.0055872	0.016341	0.775531	397	3
CLASP2	10	2.25074	0.0056139	0.021874	0.832252	398	5
ATP6V1E1	5	2.24864	0.0056411	0.016482	0.77654	399	3
DLD	4	2.24672	0.0056661	0.015378	0.75306	400	3
CBFB	5	2.2458	0.0056781	0.016569	0.777352	401	3
RASAL2	5	2.24399	0.0057018	0.016625	0.777352	402	1
LYG2	10	2.24368	0.0057059	0.0222	0.832252	403	3
TCERG1	5	2.24219	0.0057254	0.01668	0.777913	404	3
ARPC4	6	2.24008	0.0057533	0.019421	0.804466	405	2
VPS33A	5	2.23821	0.0057781	0.016818	0.777913	406	2
ARMCX1	5	2.23342	0.0058422	0.016975	0.777913	407	2
FAM102A	5	2.23278	0.0058508	0.016996	0.777913	408	2
SMIM4	5	2.22983	0.0058908	0.017103	0.777913	409	3
C4orf47	5	2.22968	0.0058928	0.017107	0.777913	410	2
FAM129A	5	2.22913	0.0059003	0.017127	0.777913	411	3
TRUB1	5	2.22785	0.0059176	0.017173	0.777913	412	3
SLC45A3	5	2.22765	0.0059204	0.017179	0.777913	413	3
RARA	10	2.22512	0.005955	0.023073	0.832252	414	3
WDFY3	5	2.22359	0.005976	0.017312	0.780106	415	2
TMEM116	5	2.22208	0.0059968	0.017363	0.780106	416	3
SERPINB11	5	2.22026	0.006022	0.017414	0.780106	417	3
SH2D4B	3	2.22025	0.0060221	0.014107	0.726441	418	1
ZRSR2	5	2.21886	0.0060415	0.017457	0.780106	419	3
RABEP1	5	2.21822	0.0060504	0.017478	0.780106	420	3
SPICE1	4	2.21674	0.006071	0.01642	0.775548	421	3
ASRGL1	5	2.21473	0.0060992	0.017595	0.783442	422	1
PRUNE2	5	2.21215	0.0061355	0.017685	0.784095	423	3
ZFYVE27	4	2.21123	0.0061485	0.016621	0.777352	424	3
C6orf120	5	2.20771	0.0061985	0.017827	0.786977	425	1
STON1	5	2.20687	0.0062105	0.017855	0.786977	426	3
PCDHGA1	4	2.20312	0.0062644	0.016899	0.777913	427	3
NDUFAF2	5	2.2	0.0063096	0.018097	0.794444	428	2
GALNT18	4	2.19945	0.0063175	0.017039	0.777913	429	3
TBX10	5	2.19817	0.0063362	0.018163	0.795461	430	3
PLA2G7	4	2.19628	0.0063638	0.017168	0.777913	431	2
RABIF	5	2.19446	0.0063906	0.018284	0.796377	432	3
RAB18	5	2.19401	0.0063972	0.018302	0.796377	433	2
FAM173B	5	2.19066	0.0064468	0.01841	0.796377	434	2
POLQ	5	2.19062	0.0064473	0.018411	0.796377	435	3
HSD11B1	5	2.19055	0.0064483	0.018412	0.796377	436	2
ZNF628	5	2.18991	0.0064579	0.01844	0.796377	437	3
NEK8	5	2.18694	0.0065022	0.018547	0.799156	438	3
FAXDC2	10	2.17953	0.0066141	0.025342	0.850372	439	4
EMC8	5	2.17866	0.0066274	0.018855	0.801947	440	3
NPR3	5	2.17425	0.006695	0.019022	0.801947	441	1
PYGO1	5	2.17379	0.0067021	0.019042	0.801947	442	3
KCNK10	5	2.17325	0.0067104	0.01906	0.801947	443	3
BMP8A	5	2.17325	0.0067104	0.01906	0.801947	444	3
DCAKD	10	2.17146	0.0067382	0.025733	0.851878	445	4
RAB5C	10	2.17117	0.0067427	0.025753	0.851878	446	5
COPA	5	2.17104	0.0067447	0.01913	0.801947	447	2
IQCF3	9	2.17056	0.0067521	0.025075	0.84598	448	4
STEAP1	5	2.16977	0.0067644	0.019174	0.801947	449	2
ERVW-1	10	2.16909	0.006775	0.025859	0.851878	450	4
PI4K2B	5	2.16819	0.006789	0.01924	0.801947	451	3
PLAGL1	10	2.16705	0.0068069	0.025977	0.852238	452	4
NRSN2	5	2.16662	0.0068136	0.0193	0.801947	453	2
LMF1	10	2.16642	0.0068168	0.026017	0.852238	454	2
TAL1	5	2.16254	0.0068779	0.019456	0.804466	455	2
MYO16	10	2.16187	0.0068886	0.026284	0.852667	456	4
SUCLA2	5	2.16155	0.0068936	0.01949	0.804466	457	1
GIT2	6	2.16138	0.0068963	0.022181	0.832252	458	2
GTF2F2	5	2.15844	0.0069432	0.019609	0.807061	459	2
TRIM31	5	2.1576	0.0069567	0.019645	0.807061	460	3
ACTA2	11	2.15728	0.0069618	0.027115	0.854644	461	4
ATP5J2	7	2.15685	0.0069686	0.0229	0.832252	462	3
TPMT	5	2.15662	0.0069724	0.019682	0.807061	463	2
RRS1	4	2.15558	0.0069891	0.018743	0.801947	464	1
PPP2CA	5	2.15166	0.0070524	0.01987	0.807415	465	3
OR10W1	5	2.15073	0.0070675	0.019904	0.807415	466	2
RTFDC1	4	2.14882	0.0070987	0.019012	0.801947	467	2
ARL14EPL	4	2.14823	0.0071083	0.019041	0.801947	468	1
MRPL38	5	2.14797	0.0071127	0.020006	0.809658	469	2
CCDC54	4	2.14662	0.0071347	0.019108	0.801947	470	3
NFKBIZ	10	2.14657	0.0071356	0.027132	0.854644	471	3
PDE3B	5	2.14619	0.0071418	0.020074	0.810649	472	1
PIP5K1A	5	2.14319	0.0071914	0.020186	0.812126	473	2
C14orf169	5	2.14214	0.0072087	0.020228	0.812126	474	3
NKIRAS1	5	2.14175	0.0072152	0.020241	0.812126	475	3
FAM167A	10	2.14134	0.007222	0.02744	0.854667	476	5
SNIP1	5	2.13879	0.0072646	0.020344	0.81341	477	3
MOV10L1	5	2.13727	0.00729	0.020413	0.81341	478	2
C11orf85	5	2.13724	0.0072906	0.020415	0.81341	479	1
OXA1L	3	2.13467	0.0073339	0.016378	0.775531	480	1
PSMB2	5	2.13017	0.0074102	0.020689	0.81341	481	2
UNC50	5	2.12988	0.0074152	0.020703	0.81341	482	3
GNB3	5	2.12948	0.0074219	0.020719	0.81341	483	3
COG4	5	2.12942	0.007423	0.020724	0.81341	484	2
SPAG16	4	2.12925	0.007426	0.019869	0.807415	485	1
APOC2	5	2.12912	0.0074282	0.020736	0.81341	486	2
MRGPRX3	5	2.12871	0.0074352	0.020753	0.81341	487	3
P2RX2	4	2.12833	0.0074416	0.019907	0.807415	488	3
ZC3H8	5	2.12689	0.0074663	0.020835	0.813859	489	3
TMEM106C	5	2.12289	0.0075355	0.021002	0.815041	490	3
DHRS2	5	2.1227	0.0075387	0.021008	0.815041	491	1
MED6	5	2.12254	0.0075416	0.021013	0.815041	492	3
DAXX	10	2.11983	0.0075888	0.028702	0.860065	493	3
GAPDH	10	2.1186	0.0076102	0.028776	0.860065	494	2
COPG1	10	2.11735	0.0076322	0.028844	0.860065	495	5
DRAXIN	5	2.11555	0.0076639	0.021301	0.824504	496	3
ANKAR	5	2.11011	0.0077605	0.021539	0.830282	497	3
POLR1A	5	2.10777	0.0078025	0.021646	0.832252	498	2
MRPL10	4	2.10662	0.0078231	0.020851	0.813859	499	3
PVALB	5	2.10315	0.0078859	0.021853	0.832252	500	1
MROH2A	5	2.10043	0.0079355	0.021984	0.832252	501	2
HIST1H3G	5	2.09963	0.00795	0.022021	0.832252	502	3
PATE3	5	2.09932	0.0079558	0.022035	0.832252	503	3
KLK3	5	2.09837	0.0079732	0.022074	0.832252	504	3
SERPINB13	5	2.09609	0.0080151	0.022167	0.832252	505	3
RRN3	3	2.09219	0.0080874	0.017693	0.784095	506	2
PDCD2L	4	2.09217	0.0080878	0.021509	0.830282	507	3
NXF2	11	2.09187	0.0080934	0.030824	0.873375	508	4
HNRNPA2B1	5	2.09106	0.0081085	0.022393	0.832252	509	3
DDX59	5	2.09081	0.0081132	0.022404	0.832252	510	3
RAB21	5	2.09039	0.0081211	0.022425	0.832252	511	3
OR1C1	5	2.09018	0.0081249	0.022438	0.832252	512	3
CHRNE	5	2.08924	0.0081425	0.022483	0.832252	513	2
ESRRG	10	2.08869	0.0081529	0.030638	0.873375	514	4
MTHFD2L	5	2.08868	0.0081531	0.022511	0.832252	515	3
SARM1	10	2.08593	0.0082049	0.030817	0.873375	516	1
TSSK1B	5	2.08297	0.008261	0.022774	0.832252	517	2
KMT2B	10	2.08205	0.0082784	0.03106	0.873375	518	5
FAM228A	5	2.08183	0.0082826	0.022834	0.832252	519	1
C15orf53	5	2.07969	0.0083236	0.022936	0.832252	520	3
TMEM156	5	2.07957	0.0083259	0.022945	0.832252	521	2
COG2	5	2.07924	0.0083322	0.02296	0.832252	522	1
CRBN	5	2.079	0.0083368	0.02297	0.832252	523	2
SLC22A7	4	2.07795	0.008357	0.022178	0.832252	524	2
TLDC1	5	2.07782	0.0083594	0.023029	0.832252	525	3
ZNF444	5	2.0751	0.0084121	0.023156	0.832252	526	3
FLAD1	5	2.0741	0.0084314	0.023197	0.832252	527	1
TMX4	5	2.07175	0.0084771	0.023293	0.832252	528	3
PPIL1	5	2.07113	0.0084893	0.023322	0.832252	529	3
AIM2	5	2.07015	0.0085084	0.023371	0.832252	530	3
TCAP	5	2.06966	0.0085181	0.023394	0.832252	531	3
SGCB	5	2.06903	0.0085305	0.023424	0.832252	532	2
WBP2	5	2.0667	0.0085763	0.023534	0.832252	533	3
CX3CL1	4	2.06666	0.008577	0.022751	0.832252	534	1
CCL2	5	2.06666	0.0085771	0.023535	0.832252	535	2
ADNP	5	2.06651	0.0085801	0.023543	0.832252	536	1
CTAG2	5	2.06401	0.0086296	0.023685	0.832252	537	1
C15orf54	5	2.06167	0.0086763	0.023779	0.832252	538	2
CCDC135	5	2.06152	0.0086792	0.023785	0.832252	539	1
USO1	5	2.06106	0.0086884	0.023804	0.832252	540	3
OR2T11	5	2.06057	0.0086982	0.023824	0.832252	541	3
PBK	5	2.05918	0.0087261	0.023893	0.832252	542	3
BTN3A1	5	2.05849	0.0087399	0.023922	0.832252	543	3
AHCY	5	2.05825	0.0087449	0.023935	0.832252	544	3
OR2B3	5	2.05725	0.008765	0.023974	0.832252	545	2
KRTAP22-1	5	2.05659	0.0087783	0.023999	0.832252	546	2
IGFBP5	4	2.05428	0.0088252	0.023372	0.832252	547	3
FAM174A	5	2.05414	0.0088279	0.024122	0.832252	548	1
PCDH18	5	2.05368	0.0088373	0.024142	0.832252	549	2
SUCO	5	2.05149	0.008882	0.024244	0.832252	550	3
TMEM192	5	2.04937	0.0089255	0.024342	0.832252	551	3
C1orf141	5	2.04929	0.008927	0.024346	0.832252	552	2
HOXD13	5	2.04901	0.0089329	0.024362	0.832252	553	3
RFPL4AL1	5	2.04889	0.0089354	0.024369	0.832252	554	3
C17orf47	5	2.04816	0.0089504	0.024404	0.832252	555	3
PPP1R21	5	2.04731	0.0089679	0.024445	0.832252	556	3
DNAJC8	5	2.04514	0.0090129	0.024541	0.833983	557	3
EDDM3B	4	2.04321	0.0090529	0.023954	0.832252	558	1
MOB4	5	2.0401	0.0091181	0.024779	0.839024	559	2
RNF168	5	2.03864	0.0091488	0.024852	0.839979	560	3
CRHBP	4	2.03499	0.0092259	0.024385	0.832252	561	2
LRRC59	9	2.0332	0.009264	0.032038	0.874696	562	4
PAPOLG	5	2.03253	0.0092783	0.025164	0.847455	563	3
SASH3	4	2.03011	0.0093301	0.024652	0.836247	564	3
DDX50	5	2.02992	0.0093343	0.02532	0.850372	565	2
LGI1	5	2.02646	0.009409	0.025487	0.851878	566	3
NOL6	2	2.0259	0.0094211	0.017885	0.786977	567	2
MFAP3L	5	2.02584	0.0094224	0.025515	0.851878	568	1
GTF2H5	5	2.02409	0.0094605	0.025621	0.851878	569	2
PSMD13	5	2.02361	0.0094709	0.025648	0.851878	570	3
TXNDC8	5	2.02129	0.0095215	0.02577	0.851878	571	2
GFI1B	5	2.01987	0.0095528	0.025845	0.851878	572	2
SPINK2	5	2.01904	0.009571	0.025889	0.851878	573	2
ADO	5	2.01594	0.0096397	0.02606	0.852238	574	2
MAGEB2	5	2.01487	0.0096633	0.026116	0.852238	575	3
NUP155	5	2.01457	0.0096701	0.026129	0.852238	576	2
ZHX1-C8ORF76	4	2.01403	0.009682	0.025537	0.851878	577	3
RPS6KA6	5	2.01147	0.0097394	0.026313	0.852667	578	3
ATXN7L3	5	2.01072	0.0097561	0.026349	0.852667	579	2
MYO1F	5	2.01018	0.0097684	0.026375	0.852667	580	3
PFAS	5	2.01006	0.009771	0.026383	0.852667	581	3
MIER1	10	2.00973	0.0097785	0.036145	0.898215	582	3
DNASE1L1	10	2.00957	0.009782	0.036156	0.898215	583	5
SLCO1C1	5	2.00772	0.0098238	0.026504	0.852667	584	3
PLA2G12B	5	2.00709	0.009838	0.026532	0.852667	585	2
ACTR6	5	2.00606	0.0098615	0.026584	0.852667	586	3
ACOT6	5	2.00576	0.0098682	0.026599	0.852667	587	2
NUDT7	5	2.00376	0.0099139	0.026711	0.854464	588	3
MIOS	5	2.00143	0.0099672	0.026839	0.854464	589	1
LHFPL3	5	2.00065	0.0099851	0.026879	0.854464	590	2
GAS8	10	2.00056	0.009987	0.036713	0.904816	591	2
CELF6	5	2.00013	0.0099969	0.026912	0.854464	592	2
PLXNA4	5	1.9984	0.010037	0.027003	0.854464	593	3
PQBP1	5	1.99835	0.010038	0.027005	0.854464	594	2
TSNARE1	5	1.99831	0.010039	0.027008	0.854464	595	3
ELP3	5	1.99805	0.010045	0.027021	0.854464	596	3
YARS	4	1.9977	0.010053	0.026466	0.852667	597	3
KIAA0408	5	1.99499	0.010116	0.027186	0.854644	598	1
PLBD1	5	1.99448	0.010128	0.02721	0.854644	599	3
LHX4	5	1.99375	0.010145	0.02726	0.854667	600	2
LAT2	5	1.99298	0.010163	0.02731	0.854667	601	3
FAM154A	5	1.99114	0.010206	0.027415	0.854667	602	3
ATP5F1	5	1.99076	0.010215	0.027436	0.854667	603	1
SNX10	5	1.98843	0.01027	0.027571	0.857318	604	2
FXYD3	5	1.9864	0.010318	0.027668	0.85889	605	3
STXBP2	5	1.9854	0.010342	0.027735	0.859569	606	2
DAD1	5	1.98451	0.010363	0.027782	0.859588	607	1
CKM	10	1.98347	0.010388	0.037749	0.910651	608	4
VSIG10L	9	1.98305	0.010398	0.035175	0.889231	609	3
NDUFAF5	5	1.9823	0.010416	0.027915	0.860065	610	3
COL6A2	5	1.98172	0.01043	0.027941	0.860065	611	3
PTCD3	5	1.98039	0.010462	0.028026	0.860065	612	1
ORC6	5	1.97885	0.010499	0.028114	0.860065	613	2
RNASEK	1	1.97774	0.010526	0.01045	0.654246	614	1
MYH15	5	1.97613	0.010565	0.028278	0.860065	615	3
COG7	5	1.97588	0.010571	0.028292	0.860065	616	2
CENPI	3	1.97556	0.010579	0.02198	0.832252	617	2
CD5L	5	1.97453	0.010604	0.028371	0.860065	618	3
IFI44L	5	1.97445	0.010606	0.028375	0.860065	619	3
TDRD7	5	1.97424	0.010611	0.028387	0.860065	620	1
DYNC1I2	4	1.97232	0.010658	0.027969	0.860065	621	3
EFR3A	5	1.9709	0.010693	0.028576	0.860065	622	2
GLYATL1	10	1.97066	0.010699	0.038562	0.910651	623	2
TRIM10	5	1.97033	0.010707	0.02861	0.860065	624	3
ITLN1	5	1.96993	0.010717	0.028637	0.860065	625	2
CDON	4	1.96989	0.010718	0.028102	0.860065	626	1
GBP3	5	1.96891	0.010742	0.028696	0.860065	627	2
OLR1	5	1.96887	0.010743	0.028699	0.860065	628	3
MTFMT	5	1.96811	0.010762	0.028742	0.860065	629	3
KLK2	5	1.96799	0.010765	0.02875	0.860065	630	3
TLX1NB	3	1.96698	0.01079	0.022347	0.832252	631	2
SCYL1	5	1.96621	0.010809	0.028858	0.860065	632	3
R3HDM4	10	1.96589	0.010817	0.03887	0.910651	633	3
PDCD11	2	1.96573	0.010821	0.020528	0.81341	634	1
SPCS3	10	1.96549	0.010827	0.038893	0.910651	635	2
APOM	5	1.96289	0.010892	0.02905	0.862024	636	3
SNRPC	5	1.96269	0.010897	0.029062	0.862024	637	3
RILPL2	5	1.96082	0.010944	0.029187	0.86301	638	2
UTP15	4	1.96039	0.010955	0.028676	0.860065	639	1
CHD1	5	1.9564	0.011056	0.029473	0.869836	640	1
PHACTR2	5	1.9553	0.011084	0.029544	0.869836	641	3
SCAF1	4	1.95261	0.011153	0.029188	0.86301	642	1
IFT52	5	1.95253	0.011155	0.029711	0.869836	643	1
OR2A2	5	1.95218	0.011164	0.029736	0.869836	644	3
PI15	5	1.95206	0.011167	0.029745	0.869836	645	3
PSMD1	4	1.94661	0.011308	0.029562	0.869836	646	3
TRMT61B	5	1.94397	0.011377	0.030221	0.873375	647	3
GALM	5	1.9439	0.011379	0.030223	0.873375	648	2
RTF1	4	1.94378	0.011382	0.029741	0.869836	649	2
OR2J3	5	1.94302	0.011402	0.030282	0.873375	650	1
UBAP2L	5	1.94294	0.011404	0.030285	0.873375	651	3
ZBTB41	5	1.9415	0.011442	0.030381	0.873375	652	2
TMEM191C	5	1.93923	0.011502	0.030529	0.873375	653	3
HEATR1	5	1.93794	0.011536	0.030606	0.873375	654	2
ZNF18	5	1.93652	0.011574	0.030699	0.873375	655	2
ERI2	5	1.93532	0.011606	0.030768	0.873375	656	2
XIRP1	5	1.93483	0.011619	0.030803	0.873375	657	3
DOHH	5	1.93326	0.011661	0.030902	0.873375	658	3
RIC3	5	1.93285	0.011672	0.030931	0.873375	659	3
CSTF3	5	1.93185	0.011699	0.030999	0.873375	660	1
HIST1H2BF	5	1.93174	0.011702	0.031006	0.873375	661	3
MAP3K4	5	1.93152	0.011708	0.031018	0.873375	662	3
TMEM151B	5	1.93004	0.011748	0.031104	0.873375	663	1
SHC1	10	1.92937	0.011766	0.041361	0.916837	664	1
HIST1H4G	5	1.92933	0.011767	0.03115	0.873375	665	3
OPN4	3	1.9293	0.011768	0.024038	0.832252	666	1
ALG1	5	1.92849	0.01179	0.031203	0.873375	667	3
FGF5	5	1.92819	0.011798	0.031218	0.873375	668	2
SIAH3	5	1.92771	0.011811	0.031252	0.873375	669	3
ARSB	5	1.92731	0.011822	0.031279	0.873375	670	2
SPOPL	5	1.92639	0.011847	0.031346	0.873375	671	1
PTPLAD1	5	1.92617	0.011853	0.031361	0.873375	672	3
TIA1	5	1.92573	0.011865	0.031391	0.873375	673	3
CPSF4	5	1.92544	0.011873	0.031411	0.873375	674	2
CHMP6	4	1.92507	0.011883	0.030952	0.873375	675	3
MYL4	5	1.92427	0.011905	0.031483	0.873905	676	2
DEFB119	4	1.92394	0.011914	0.031028	0.873375	677	3
KCNA10	5	1.92358	0.011924	0.031532	0.873905	678	3
CD151	5	1.92216	0.011963	0.031617	0.873905	679	3
SSR3	5	1.92096	0.011996	0.031695	0.874234	680	1
BUB1	5	1.92064	0.012005	0.031723	0.874234	681	3
NEURL	5	1.91937	0.01204	0.031811	0.874696	682	2
USPL1	5	1.918	0.012078	0.031911	0.874696	683	3
WDR5B	4	1.91783	0.012083	0.031287	0.873375	684	2
MED27	5	1.91707	0.012104	0.031972	0.874696	685	2
IPO13	5	1.91686	0.01211	0.031987	0.874696	686	3
MKRN1	5	1.91564	0.012144	0.032066	0.874696	687	2
COX6B1	5	1.91268	0.012227	0.03227	0.876	688	2
DDOST	5	1.91211	0.012243	0.032304	0.876	689	3
GJD3	10	1.91154	0.012259	0.042685	0.92026	690	4
AIM1L	10	1.91151	0.01226	0.042688	0.92026	691	2
C1QTNF2	4	1.91147	0.012261	0.03158	0.873905	692	1
PDLIM5	6	1.90995	0.012304	0.034413	0.889231	693	2
RLIM	5	1.90971	0.012311	0.032475	0.87937	694	2
IARS	5	1.90861	0.012342	0.032543	0.879933	695	1
ID3	5	1.90696	0.012389	0.032654	0.880285	696	3
TRMT1L	5	1.90689	0.012391	0.032659	0.880285	697	1
THAP1	5	1.90633	0.012407	0.032702	0.880285	698	3
RHO	5	1.90556	0.012429	0.032761	0.880285	699	2
AOAH	5	1.90504	0.012444	0.032793	0.880285	700	3
AAMP	5	1.90431	0.012465	0.032839	0.880285	701	1
CNPY3	5	1.9026	0.012514	0.032944	0.88182	702	2
LSM12	4	1.90039	0.012578	0.032068	0.874696	703	2
ATP6V1H	5	1.90035	0.012579	0.033106	0.88489	704	2
KYNU	4	1.89767	0.012657	0.032194	0.876	705	1
C19orf80	5	1.89664	0.012687	0.033364	0.889231	706	1
EHF	5	1.8965	0.012691	0.033373	0.889231	707	2
CRIM1	4	1.89633	0.012696	0.032253	0.876	708	1
HIF1AN	5	1.89514	0.012731	0.033452	0.889231	709	2
IL1RL1	5	1.89327	0.012786	0.033577	0.889231	710	2
CDH1	5	1.89323	0.012787	0.033578	0.889231	711	3
PSG11	5	1.89049	0.012868	0.033773	0.889231	712	3
CDC7	5	1.88992	0.012885	0.033805	0.889231	713	1
NDUFA10	5	1.88975	0.01289	0.033813	0.889231	714	3
E4F1	5	1.88954	0.012896	0.033828	0.889231	715	2
MEMO1	5	1.88944	0.012899	0.033837	0.889231	716	3
PRDM8	10	1.88706	0.01297	0.044512	0.930288	717	3
UBL3	5	1.88659	0.012984	0.03404	0.889231	718	1
INO80B	5	1.88556	0.013015	0.0341	0.889231	719	3
RAB11A	5	1.88329	0.013083	0.034258	0.889231	720	1
UBXN1	5	1.88263	0.013103	0.034298	0.889231	721	3
PDK2	5	1.88167	0.013132	0.034376	0.889231	722	1
SEC24C	5	1.88065	0.013163	0.034455	0.889231	723	2
LRFN5	5	1.87946	0.013199	0.034541	0.889231	724	3
MSANTD4	5	1.8791	0.01321	0.034574	0.889231	725	2
TBCD	5	1.87864	0.013224	0.034616	0.889231	726	3
SYCP2L	5	1.87821	0.013237	0.034643	0.889231	727	2
PRKCI	5	1.87801	0.013243	0.034659	0.889231	728	3
COPE	5	1.87755	0.013257	0.034692	0.889231	729	2
PPP1R9B	5	1.8769	0.013277	0.034735	0.889231	730	2
PCM1	5	1.8768	0.01328	0.03474	0.889231	731	3
SPTB	5	1.87602	0.013304	0.034789	0.889231	732	3
RBM4B	5	1.87537	0.013324	0.034837	0.889231	733	2
RIOK2	5	1.87517	0.01333	0.034849	0.889231	734	1
PRIMPOL	5	1.87449	0.013351	0.034902	0.889231	735	2
NABP1	5	1.87426	0.013358	0.034912	0.889231	736	2
CCT5	5	1.87403	0.013365	0.034926	0.889231	737	3
ADD3	5	1.87205	0.013426	0.035059	0.889231	738	2
AEN	5	1.87118	0.013453	0.035133	0.889231	739	3
ZSCAN32	5	1.87095	0.01346	0.035148	0.889231	740	2
C19orf54	5	1.87063	0.01347	0.035174	0.889231	741	3
ATP1B3	5	1.86899	0.013521	0.035281	0.890721	742	2
PARD6G	5	1.86617	0.013609	0.035497	0.892268	743	2
C11orf54	5	1.86595	0.013616	0.035515	0.892268	744	2
ZNF41	5	1.86563	0.013626	0.035534	0.892268	745	1
CBLN3	5	1.86328	0.0137	0.035718	0.895687	746	3
IQCB1	5	1.86252	0.013724	0.035776	0.895947	747	1
ZNF688	5	1.86173	0.013749	0.035843	0.896405	748	3
LMBRD2	5	1.85924	0.013828	0.036033	0.898215	749	2
PHLDA3	5	1.85839	0.013855	0.036093	0.898215	750	2
ENDOD1	5	1.85783	0.013873	0.036137	0.898215	751	3
U2SURP	5	1.85692	0.013902	0.03621	0.898222	752	3
HSP90B1	5	1.8563	0.013922	0.036252	0.898222	753	3
PFDN2	1	1.85511	0.01396	0.013849	0.726441	754	1
AGAP11	5	1.85477	0.013971	0.036355	0.899565	755	1
MPEG1	5	1.85387	0.014	0.036421	0.899975	756	2
OPRD1	5	1.85322	0.014021	0.036468	0.899975	757	1
SLC13A3	5	1.84906	0.014156	0.036784	0.905372	758	3
NAE1	5	1.84716	0.014218	0.03693	0.906193	759	1
IGJ	5	1.84713	0.014219	0.036933	0.906193	760	3
PPP1R1B	5	1.84664	0.014235	0.036974	0.906193	761	2
PEX2	5	1.8457	0.014266	0.037042	0.906193	762	3
SHISA2	5	1.84518	0.014283	0.037078	0.906193	763	3
APOL3	5	1.84479	0.014296	0.037108	0.906193	764	3
BAG4	5	1.84415	0.014317	0.037161	0.90629	765	1
KRTAP5-9	5	1.84327	0.014346	0.037234	0.906689	766	2
KLK14	5	1.84266	0.014366	0.037275	0.906689	767	1
NF1	5	1.84119	0.014415	0.037387	0.908242	768	2
PITX2	10	1.84067	0.014432	0.0482	0.946872	769	3
TRMT10C	4	1.84058	0.014435	0.035081	0.889231	770	2
UBXN11	5	1.83962	0.014467	0.037506	0.909958	771	3
TMEM87A	4	1.83938	0.014475	0.035152	0.889231	772	2
CENPN	6	1.83687	0.014559	0.039467	0.911041	773	3
GIPC2	5	1.83681	0.014561	0.037721	0.910651	774	3
RNF167	5	1.83675	0.014563	0.037726	0.910651	775	1
TNFAIP8L2	5	1.83568	0.014599	0.037811	0.910651	776	3
VEGFA	5	1.83526	0.014613	0.03784	0.910651	777	1
GET4	5	1.83461	0.014635	0.037891	0.910651	778	3
UPF3B	5	1.83398	0.014656	0.037938	0.910651	779	3
RALBP1	5	1.83348	0.014673	0.037981	0.910651	780	3
RPS25	5	1.83236	0.014711	0.038069	0.910651	781	2
MRPL13	4	1.83233	0.014712	0.035532	0.892268	782	1
TLX1	6	1.83174	0.014732	0.039839	0.911041	783	2
PRPSAP1	5	1.83168	0.014734	0.038116	0.910651	784	3
CPED1	5	1.83088	0.014761	0.038187	0.910651	785	1
NDUFB9	5	1.82944	0.01481	0.03831	0.910651	786	1
C12orf45	5	1.82839	0.014846	0.038388	0.910651	787	3
OR6K3	5	1.82819	0.014853	0.038405	0.910651	788	3
LRRC18	5	1.82801	0.014859	0.038417	0.910651	789	1
HSBP1	5	1.8274	0.01488	0.038466	0.910651	790	3
ZNF414	5	1.82655	0.014909	0.038544	0.910651	791	1
TMEM196	5	1.82571	0.014938	0.038613	0.910651	792	2
OR10A7	5	1.82513	0.014958	0.038654	0.910651	793	1
THSD4	9	1.82414	0.014992	0.047676	0.945271	794	3
TMED8	5	1.82411	0.014993	0.038737	0.910651	795	3
ZNF581	5	1.82405	0.014995	0.038739	0.910651	796	2
SLC25A46	5	1.82261	0.015045	0.038841	0.910651	797	2
VSTM2A	5	1.82102	0.0151	0.038975	0.910651	798	3
PUF60	5	1.82085	0.015106	0.038988	0.910651	799	2
EFHB	5	1.82062	0.015114	0.03901	0.910651	800	3
ZNF669	5	1.82022	0.015128	0.039044	0.910651	801	3
TMLHE	5	1.81953	0.015152	0.039102	0.910651	802	2
HIST1H4K	5	1.81804	0.015204	0.039233	0.910651	803	2
NR1D1	5	1.8179	0.015209	0.039243	0.910651	804	2
IFFO1	10	1.81776	0.015214	0.050156	0.955757	805	4
NDUFB4	5	1.81636	0.015263	0.039374	0.911041	806	3
BLOC1S3	10	1.81505	0.015309	0.050403	0.955757	807	4
SEC62	5	1.81384	0.015352	0.039584	0.911041	808	1
RAC3	5	1.81242	0.015402	0.039693	0.911041	809	1
MS4A14	5	1.81163	0.01543	0.039766	0.911041	810	3
SERPINB7	10	1.81127	0.015443	0.05075	0.956451	811	3
DDI1	5	1.81118	0.015446	0.039805	0.911041	812	2
SLC25A36	5	1.81104	0.015451	0.039814	0.911041	813	1
KLF1	5	1.80956	0.015504	0.039926	0.911041	814	3
AHNAK	10	1.8093	0.015513	0.05094	0.958056	815	1
EFCAB7	5	1.80874	0.015533	0.04001	0.911041	816	2
BSND	5	1.80827	0.01555	0.040043	0.911041	817	1
ERCC2	5	1.80713	0.015591	0.040145	0.911041	818	2
PRDM12	5	1.80693	0.015598	0.040161	0.911041	819	2
HNRNPUL1	5	1.8069	0.015599	0.040162	0.911041	820	1
CCT4	5	1.80612	0.015627	0.040226	0.911041	821	3
FZD6	5	1.80574	0.015641	0.040262	0.911041	822	2
FBXO36	5	1.80526	0.015658	0.0403	0.911041	823	3
GPHB5	5	1.80471	0.015678	0.040346	0.911041	824	2
HECW2	5	1.80432	0.015692	0.040383	0.911041	825	2
TMEM167A	5	1.80338	0.015726	0.040464	0.911112	826	3
UBE2E3	5	1.8028	0.015747	0.040526	0.911112	827	2
NPBWR2	5	1.80272	0.01575	0.040533	0.911112	828	2
MAD2L1BP	5	1.80145	0.015796	0.040634	0.911385	829	3
PRSS58	5	1.80132	0.015801	0.040643	0.911385	830	3
ZBTB1	5	1.80046	0.015832	0.040709	0.911765	831	3
SRRT	3	1.79896	0.015887	0.031087	0.873375	832	2
TOR4A	5	1.79877	0.015894	0.040864	0.914138	833	1
NSF	5	1.7974	0.015944	0.040991	0.915889	834	2
MAGEB1	10	1.7968	0.015966	0.052081	0.958389	835	4
MVK	4	1.79656	0.015975	0.037572	0.910357	836	2
FBXO42	5	1.79471	0.016043	0.041215	0.916837	837	2
UGDH	5	1.79366	0.016082	0.041306	0.916837	838	3
CXorf61	5	1.79339	0.016092	0.041331	0.916837	839	1
CMAS	5	1.79293	0.016109	0.041375	0.916837	840	2
BBS10	5	1.79207	0.016141	0.041445	0.916837	841	1
TXNDC9	5	1.79175	0.016153	0.041474	0.916837	842	2
MYH8	5	1.79116	0.016175	0.041519	0.916837	843	2
EAF2	5	1.79075	0.01619	0.041559	0.916837	844	1
ARHGEF7	5	1.78917	0.016249	0.0417	0.916837	845	2
GPRC5C	5	1.78875	0.016265	0.041734	0.916837	846	3
HIST1H2AC	5	1.78859	0.016271	0.041749	0.916837	847	2
CDX4	5	1.78835	0.01628	0.041772	0.916837	848	3
GPR133	5	1.78811	0.016289	0.041801	0.916837	849	1
DDAH1	5	1.7876	0.016308	0.041836	0.916837	850	2
LRIF1	5	1.78749	0.016312	0.041843	0.916837	851	3
LIN28B	5	1.7868	0.016338	0.041904	0.916837	852	1
HINT1	5	1.78622	0.01636	0.041951	0.916837	853	2
SLC31A1	5	1.78555	0.016385	0.04201	0.916837	854	3
AP3M2	5	1.7855	0.016387	0.042016	0.916837	855	1
SLC18A3	5	1.78346	0.016464	0.042201	0.918663	856	2
BAP1	5	1.78291	0.016485	0.042245	0.918663	857	3
PEMT	5	1.78288	0.016486	0.042248	0.918663	858	3
TRAT1	5	1.7821	0.016516	0.042321	0.919196	859	2
FAM178B	5	1.78094	0.01656	0.042429	0.919511	860	3
UBASH3A	5	1.78031	0.016584	0.042484	0.919511	861	1
SEC23IP	5	1.77874	0.016644	0.042631	0.92026	862	3
MAP4K4	5	1.77773	0.016683	0.042716	0.92026	863	1
TMSB4X	10	1.77747	0.016693	0.053931	0.959803	864	1
PON2	5	1.77645	0.016732	0.042833	0.921528	865	1
GPX6	5	1.77599	0.01675	0.042873	0.921528	866	3
SLC35F1	5	1.77518	0.016781	0.042952	0.922154	867	2
LGALS7	5	1.77317	0.016859	0.043133	0.924986	868	2
LIPE	10	1.77247	0.016886	0.05442	0.959803	869	4
NKAIN3	4	1.77157	0.016921	0.039104	0.910651	870	2
TM9SF3	5	1.77137	0.016929	0.043291	0.9273	871	1
CHDC2	4	1.77055	0.016961	0.039171	0.910651	872	1
AACS	5	1.76999	0.016983	0.043411	0.92774	873	3
OASL	5	1.76924	0.017012	0.043485	0.92774	874	3
LENG9	5	1.76886	0.017027	0.043522	0.92774	875	1
CNGA3	5	1.76777	0.01707	0.043619	0.92774	876	2
RAPGEF5	5	1.76718	0.017093	0.043672	0.92774	877	2
NUP160	4	1.76655	0.017118	0.039428	0.911041	878	2
C17orf78	5	1.76624	0.01713	0.043759	0.92774	879	2
SLC38A8	5	1.76563	0.017154	0.043818	0.927934	880	3
SSH2	5	1.7651	0.017175	0.043872	0.928027	881	2
CCDC92	5	1.76432	0.017206	0.043939	0.9284	882	2
TLE2	5	1.76291	0.017262	0.044068	0.930071	883	3
SCAMP5	5	1.76215	0.017292	0.044131	0.930288	884	3
COG6	5	1.76145	0.01732	0.044205	0.930288	885	2
GPR114	5	1.76073	0.017349	0.044282	0.930288	886	3
SUV420H1	5	1.76035	0.017364	0.04432	0.930288	887	3
IGSF22	5	1.75975	0.017388	0.044373	0.930288	888	2
DSE	10	1.75945	0.0174	0.055705	0.964093	889	4
CCDC173	4	1.7591	0.017414	0.039893	0.911041	890	2
SERPINA5	5	1.75893	0.017421	0.04444	0.930288	891	1
C5AR1	5	1.7584	0.017442	0.04449	0.930288	892	2
LTBR	5	1.75669	0.017511	0.044658	0.930577	893	3
STON1-GTF2A1L	5	1.75652	0.017518	0.044678	0.930577	894	2
PLCB2	5	1.75642	0.017522	0.044691	0.930577	895	3
OR5AR1	4	1.75471	0.017591	0.040164	0.911041	896	1
FGF16	5	1.75464	0.017594	0.044861	0.930622	897	2
FANCC	5	1.75454	0.017598	0.044864	0.930622	898	3
DHX35	5	1.75404	0.017618	0.044908	0.930622	899	2
VHL	5	1.75367	0.017633	0.044934	0.930622	900	2
NADSYN1	5	1.75124	0.017732	0.045166	0.934211	901	2
SLC4A11	5	1.75041	0.017766	0.045252	0.934964	902	2
MRPL22	3	1.75021	0.017774	0.034345	0.889231	903	2
SRRM2	5	1.74921	0.017815	0.045365	0.935337	904	2
TDRD5	5	1.74917	0.017817	0.045371	0.935337	905	2
MDM1	5	1.74802	0.017864	0.045479	0.936112	906	1
GPX5	5	1.74766	0.017879	0.045516	0.936112	907	2
FAM26D	5	1.747	0.017906	0.045588	0.936112	908	3
SULT1A2	5	1.74683	0.017913	0.045609	0.936112	909	2
PPP1R8	5	1.74598	0.017948	0.045698	0.936459	910	3
SMARCC1	5	1.74565	0.017962	0.045726	0.936459	911	1
MRPL18	3	1.74381	0.018038	0.034782	0.889231	912	1
GRHL3	5	1.74357	0.018048	0.045935	0.938669	913	2
SH3GL1	5	1.74254	0.018091	0.046036	0.939517	914	3
RNF165	5	1.74208	0.01811	0.046077	0.939517	915	1
TRH	5	1.74096	0.018157	0.046182	0.940632	916	2
OR5AS1	5	1.73974	0.018208	0.046289	0.940728	917	2
ABHD14A	5	1.73948	0.018219	0.046322	0.940728	918	2
KDSR	5	1.73931	0.018226	0.04634	0.940728	919	3
RNF31	5	1.73857	0.018257	0.0464	0.940728	920	1
FAM72A	5	1.73817	0.018274	0.046441	0.940728	921	2
C5orf15	5	1.73738	0.018307	0.046507	0.940728	922	1
ZNF512	5	1.7371	0.018319	0.04654	0.940728	923	3
CASR	5	1.73582	0.018373	0.046672	0.942389	924	3
PLEKHA5	5	1.73506	0.018405	0.046748	0.94289	925	1
TRAPPC6B	5	1.73393	0.018453	0.046854	0.94401	926	2
TM4SF1	5	1.7325	0.018514	0.046993	0.945271	927	3
LHX3	10	1.7318	0.018544	0.058608	0.968958	928	3
FAF2	5	1.73105	0.018576	0.047152	0.945271	929	3
ACTG1	5	1.73044	0.018602	0.047214	0.945271	930	2
ANKRD1	5	1.72958	0.018639	0.047299	0.945271	931	3
CLEC18C	6	1.72948	0.018643	0.048431	0.946872	932	3
UBAP1L	5	1.7283	0.018694	0.047414	0.945271	933	3
C1orf115	5	1.72816	0.0187	0.047429	0.945271	934	1
CNOT3	5	1.72807	0.018704	0.04744	0.945271	935	2
ALS2CL	5	1.72765	0.018722	0.047478	0.945271	936	3
ELOF1	5	1.72605	0.018791	0.047628	0.945271	937	2
CYorf17	5	1.726	0.018793	0.047631	0.945271	938	3
SCARF1	5	1.72589	0.018798	0.047647	0.945271	939	2
TAF1B	5	1.72575	0.018804	0.047659	0.945271	940	3
CINP	5	1.72476	0.018847	0.04775	0.945728	941	1
KCNJ13	5	1.72319	0.018915	0.047917	0.946872	942	3
GPNMB	10	1.72269	0.018937	0.059605	0.968958	943	3
FAP	5	1.72248	0.018946	0.047986	0.946872	944	2
PDE5A	5	1.72056	0.01903	0.048188	0.946872	945	3
TAS2R10	5	1.72047	0.019034	0.0482	0.946872	946	3
PRPF40A	5	1.72024	0.019044	0.048225	0.946872	947	2
KIAA1324	4	1.72015	0.019048	0.042436	0.919511	948	1
NOC3L	5	1.72008	0.019051	0.048242	0.946872	949	2
CES3	5	1.71935	0.019083	0.048296	0.946872	950	2
ZNF264	5	1.71913	0.019093	0.048314	0.946872	951	1
MYL5	5	1.71863	0.019115	0.04837	0.946872	952	2
TCEAL4	10	1.71826	0.019131	0.060065	0.968958	953	4
ABCA8	5	1.71756	0.019162	0.048466	0.946872	954	3
ACVR2A	5	1.71754	0.019163	0.048468	0.946872	955	2
INCA1	5	1.71683	0.019194	0.04853	0.947103	956	3
TENM3	5	1.71251	0.019386	0.048985	0.953973	957	2
OR2T12	6	1.7118	0.019418	0.050143	0.955757	958	3
CCR5	5	1.71137	0.019437	0.049094	0.954419	959	1
UBQLN4	5	1.71126	0.019442	0.04911	0.954419	960	3
ERLEC1	5	1.71001	0.019498	0.049242	0.955729	961	2
COL9A3	5	1.70805	0.019586	0.049449	0.955757	962	2
ZFYVE1	5	1.70766	0.019604	0.049492	0.955757	963	3
CARD17	5	1.70699	0.019634	0.049555	0.955757	964	2
OR2H2	4	1.70664	0.01965	0.043366	0.92774	965	2
DKK2	5	1.70644	0.019659	0.049612	0.955757	966	2
PDP1	5	1.70591	0.019683	0.049663	0.955757	967	3
CORO1C	5	1.70507	0.019721	0.049758	0.955757	968	3
TMSB10	5	1.70483	0.019732	0.049784	0.955757	969	1
OPA3	5	1.70408	0.019766	0.049875	0.955757	970	3
PGD	5	1.70375	0.019781	0.049913	0.955757	971	2
C20orf85	4	1.70287	0.019821	0.043641	0.92774	972	2
OR6B1	5	1.70268	0.01983	0.050046	0.955757	973	1
CSTF1	4	1.70171	0.019874	0.043733	0.92774	974	1
TLR9	5	1.70167	0.019876	0.050151	0.955757	975	2
TEDDM1	5	1.70141	0.019888	0.050181	0.955757	976	3
OR5D13	5	1.6998	0.019962	0.050337	0.955757	977	3
KRTAP5-1	5	1.69945	0.019978	0.050367	0.955757	978	1
POTEC	5	1.69919	0.01999	0.050403	0.955757	979	2
C1orf195	5	1.69867	0.020014	0.050459	0.955757	980	2
SLC10A6	5	1.69847	0.020023	0.05048	0.955757	981	3
OR2B6	5	1.69802	0.020044	0.050517	0.955757	982	3
NFE2L2	10	1.69767	0.02006	0.062303	0.968958	983	2
ALG2	5	1.6976	0.020063	0.050562	0.955757	984	2
RAB11FIP4	5	1.69626	0.020125	0.050708	0.956451	985	2
FFAR2	5	1.69579	0.020147	0.050752	0.956451	986	3
ZNF394	5	1.6931	0.020272	0.051031	0.958389	987	1
ZNF574	10	1.69276	0.020288	0.062884	0.968958	988	4
FAM126B	5	1.69205	0.020321	0.051157	0.958389	989	1
UBTF	5	1.69148	0.020348	0.051218	0.958389	990	2
CETN3	5	1.69101	0.02037	0.051269	0.958389	991	1
SPDL1	4	1.69067	0.020386	0.044527	0.930288	992	1
STAG1	5	1.69026	0.020405	0.05135	0.958389	993	2
AFF1	5	1.68997	0.020419	0.051384	0.958389	994	1
CACNG6	5	1.68952	0.02044	0.051423	0.958389	995	3
CNOT8	5	1.68888	0.02047	0.051487	0.958389	996	2
GNG13	5	1.68871	0.020478	0.051503	0.958389	997	3
ZBTB26	5	1.68748	0.020536	0.051631	0.958389	998	3
FBXW7	15	1.68738	0.020541	0.074606	0.997273	999	5
GNG12	5	1.68683	0.020567	0.051694	0.958389	1000	1
FIG4	5	1.68592	0.02061	0.051796	0.958389	1001	2
MYH6	10	1.6859	0.020611	0.063673	0.968958	1002	4
KIAA0232	5	1.6858	0.020616	0.051812	0.958389	1003	1
WTH3DI	5	1.68575	0.020618	0.051817	0.958389	1004	2
CSNK2A2	5	1.68546	0.020632	0.051848	0.958389	1005	3
NINJ2	10	1.68542	0.020634	0.063723	0.968958	1006	4
OR56A4	5	1.68523	0.020643	0.051874	0.958389	1007	2
SBF2	5	1.68506	0.020651	0.051895	0.958389	1008	2
CWC25	4	1.68502	0.020653	0.044942	0.930622	1009	2
FAIM3	5	1.6838	0.020711	0.052024	0.958389	1010	3
TTC4	5	1.68372	0.020715	0.052036	0.958389	1011	3
SOWAHB	5	1.68367	0.020717	0.052038	0.958389	1012	2
DNAJC24	5	1.68328	0.020736	0.052088	0.958389	1013	3
RUSC1-AS1	10	1.6829	0.020754	0.064029	0.968958	1014	3
TRIM68	5	1.68271	0.020763	0.05214	0.958401	1015	1
NRBP1	5	1.68066	0.020861	0.052352	0.958875	1016	1
FAM161B	5	1.68023	0.020882	0.052392	0.958875	1017	2
LAYN	5	1.67965	0.02091	0.052462	0.958875	1018	1
CES5A	5	1.67863	0.020959	0.052575	0.958875	1019	3
VRK2	5	1.67855	0.020963	0.052591	0.958875	1020	3
FNTA	5	1.67766	0.021006	0.052689	0.958875	1021	2
TRIP11	5	1.67733	0.021022	0.052724	0.958875	1022	2
PDE4B	5	1.67658	0.021058	0.052802	0.958875	1023	1
EPG5	5	1.67629	0.021072	0.052838	0.958875	1024	2
PCDHB15	5	1.67613	0.02108	0.052856	0.958875	1025	2
ANKRD60	5	1.67566	0.021103	0.052908	0.958875	1026	3
PDE4DIP	5	1.67494	0.021138	0.052998	0.958875	1027	2
CD19	5	1.67479	0.021145	0.053009	0.958875	1028	3
MKLN1	5	1.67459	0.021155	0.05304	0.958875	1029	3
CSF2RA	5	1.67356	0.021205	0.053152	0.959309	1030	2
DPF2	10	1.67227	0.021268	0.06532	0.972912	1031	2
ADAP2	5	1.67203	0.02128	0.05333	0.959309	1032	2
NTNG2	4	1.67182	0.02129	0.045926	0.938669	1033	1
PRR20E	5	1.67136	0.021313	0.053397	0.959309	1034	2
SPATA12	5	1.6707	0.021345	0.053463	0.959309	1035	3
TAL2	5	1.67034	0.021363	0.053499	0.959309	1036	2
DCTN3	5	1.67005	0.021377	0.053526	0.959309	1037	3
CLCN3	5	1.66983	0.021388	0.053551	0.959309	1038	2
PBLD	9	1.6691	0.021424	0.064619	0.968958	1039	3
TMEM38B	5	1.66857	0.02145	0.053702	0.95969	1040	1
C1orf65	5	1.6669	0.021533	0.053895	0.959803	1041	3
GATSL3	5	1.66659	0.021548	0.053926	0.959803	1042	2
MBOAT1	5	1.665	0.021627	0.054108	0.959803	1043	3
VCP	2	1.66488	0.021633	0.040092	0.911041	1044	1
KPNA7	5	1.6639	0.021682	0.054219	0.959803	1045	2
TMEM5	5	1.66358	0.021698	0.054262	0.959803	1046	3
HMG20B	10	1.66298	0.021728	0.066483	0.979671	1047	4
TLE6	5	1.66266	0.021744	0.054371	0.959803	1048	1
MTG1	5	1.66256	0.021749	0.054377	0.959803	1049	2
IKBIP	5	1.66168	0.021793	0.054476	0.959803	1050	1
IAPP	5	1.66138	0.021808	0.054507	0.959803	1051	2
CLDN11	5	1.66138	0.021808	0.054507	0.959803	1052	3
IGFL3	5	1.66105	0.021825	0.054543	0.959803	1053	3
TULP3	5	1.66071	0.021842	0.054583	0.959803	1054	2
NSUN6	5	1.66027	0.021864	0.054638	0.959869	1055	3
ZNF140	5	1.65906	0.021925	0.054786	0.960652	1056	3
EFTUD1	4	1.65764	0.021997	0.047019	0.945271	1057	2
OR2AK2	5	1.65683	0.022038	0.05504	0.962442	1058	3
GAS1	5	1.65681	0.022039	0.055042	0.962442	1059	1
AKT2	5	1.65437	0.022163	0.055308	0.962763	1060	2
CD33	5	1.65392	0.022186	0.055357	0.962763	1061	3
PSMC6	5	1.65359	0.022203	0.055394	0.962763	1062	3
GTF2H1	5	1.65355	0.022205	0.055402	0.962763	1063	2
NUDT2	5	1.65324	0.022221	0.055431	0.962763	1064	3
GMEB1	5	1.65298	0.022234	0.055465	0.962763	1065	3
NACA	5	1.65296	0.022235	0.055467	0.962763	1066	1
ST13	5	1.65283	0.022242	0.055482	0.962763	1067	3
RAB31	5	1.65201	0.022284	0.055577	0.962763	1068	2
NSUN3	4	1.6514	0.022315	0.047544	0.945271	1069	2
MLN	5	1.64915	0.022431	0.055911	0.964903	1070	1
ZNF747	5	1.6489	0.022444	0.055937	0.964903	1071	2
NHLRC4	5	1.64874	0.022452	0.055959	0.964903	1072	2
DENND4C	5	1.6483	0.022475	0.056011	0.964908	1073	3
BTN2A2	5	1.64678	0.022554	0.056198	0.966409	1074	3
KIAA1432	5	1.64631	0.022578	0.056249	0.966409	1075	1
MAP3K9	5	1.64626	0.022581	0.056253	0.966409	1076	2
CXorf27	5	1.64445	0.022675	0.056464	0.96829	1077	2
NKPD1	5	1.64443	0.022676	0.056467	0.96829	1078	1
DACH1	5	1.64365	0.022717	0.056561	0.968399	1079	3
CCNI	5	1.6435	0.022725	0.056577	0.968399	1080	1
MROH8	5	1.64281	0.022761	0.056657	0.96866	1081	2
CCDC28B	8	1.64271	0.022766	0.066752	0.979859	1082	3
GYPB	6	1.64262	0.022771	0.057441	0.968958	1083	3
ARC	5	1.64256	0.022774	0.056696	0.96866	1084	1
OCLN	5	1.64163	0.022823	0.05682	0.968958	1085	1
THG1L	5	1.64161	0.022824	0.056821	0.968958	1086	3
C8orf48	5	1.63943	0.022939	0.057104	0.968958	1087	3
SUMF1	5	1.6389	0.022967	0.057168	0.968958	1088	2
PTGDR	5	1.63857	0.022984	0.057208	0.968958	1089	2
FUT4	5	1.63806	0.023011	0.057262	0.968958	1090	3
MYF5	5	1.63791	0.023019	0.057288	0.968958	1091	2
SMOC1	5	1.63661	0.023088	0.057452	0.968958	1092	2
GOLPH3L	5	1.63607	0.023117	0.057519	0.968958	1093	1
DND1	5	1.63547	0.023149	0.057588	0.968958	1094	3
MLST8	5	1.63515	0.023166	0.057622	0.968958	1095	3
FRG1	5	1.635	0.023174	0.057642	0.968958	1096	2
NBL1	5	1.63354	0.023252	0.057808	0.968958	1097	2
PABPC1L	5	1.6324	0.023313	0.057947	0.968958	1098	2
BCL6B	5	1.63143	0.023365	0.058068	0.968958	1099	2
CDAN1	5	1.63086	0.023396	0.058138	0.968958	1100	3
RAB2A	5	1.63078	0.0234	0.058146	0.968958	1101	2
GAREM	4	1.6306	0.02341	0.04928	0.955729	1102	1
BRCC3	5	1.62982	0.023452	0.05826	0.968958	1103	2
EXOSC4	5	1.62967	0.02346	0.058281	0.968958	1104	2
ARAP3	5	1.62709	0.0236	0.058608	0.968958	1105	2
OR13C8	5	1.62659	0.023627	0.058659	0.968958	1106	3
MBL2	4	1.62626	0.023645	0.049651	0.955757	1107	1
PRKAG2	5	1.6261	0.023654	0.058727	0.968958	1108	3
ENDOU	5	1.62608	0.023655	0.058729	0.968958	1109	1
COQ7	5	1.6256	0.023681	0.058781	0.968958	1110	3
ALOX5	5	1.62518	0.023704	0.058835	0.968958	1111	1
ARPC2	10	1.62434	0.02375	0.071467	0.99676	1112	3
ZNF783	5	1.6234	0.023801	0.05906	0.968958	1113	2
COL13A1	5	1.62339	0.023802	0.059063	0.968958	1114	1
IFNA1	6	1.62328	0.023808	0.059685	0.968958	1115	1
HSFY1	5	1.62269	0.02384	0.05914	0.968958	1116	3
SRRD	4	1.62268	0.023841	0.04993	0.955757	1117	2
LRP1B	5	1.62249	0.023851	0.05916	0.968958	1118	2
BFAR	5	1.62213	0.023871	0.059205	0.968958	1119	2
GCM1	5	1.62186	0.023886	0.059232	0.968958	1120	3
CHKA	5	1.6216	0.0239	0.05927	0.968958	1121	1
MTMR10	5	1.62071	0.023949	0.059382	0.968958	1122	1
ANGPT4	5	1.62069	0.02395	0.059385	0.968958	1123	2
CLDN8	5	1.61963	0.024009	0.0595	0.968958	1124	3
LSM6	1	1.61921	0.024032	0.023959	0.832252	1125	1
DNAH12	5	1.6191	0.024038	0.059571	0.968958	1126	2
PPP1R14B	5	1.61894	0.024047	0.059592	0.968958	1127	2
H1FX	5	1.61894	0.024047	0.059592	0.968958	1128	1
TRPV5	5	1.61861	0.024065	0.059632	0.968958	1129	2
JMJD1C	5	1.61847	0.024073	0.059655	0.968958	1130	3
C1orf234	4	1.61842	0.024076	0.0503	0.955757	1131	1
SLC4A7	5	1.61813	0.024092	0.059692	0.968958	1132	3
PHF16	5	1.61806	0.024096	0.059703	0.968958	1133	2
POLR2D	9	1.61746	0.024129	0.071545	0.99676	1134	1
DPP9	10	1.61715	0.024146	0.072439	0.997273	1135	4
ARID3C	5	1.61629	0.024194	0.059935	0.968958	1136	1
TBCB	5	1.61624	0.024197	0.059943	0.968958	1137	2
LGR6	10	1.61601	0.02421	0.072593	0.997273	1138	4
TRIM63	5	1.61466	0.024285	0.060143	0.968958	1139	3
UGT2B7	5	1.61454	0.024292	0.060161	0.968958	1140	1
DENND4A	5	1.61377	0.024335	0.06026	0.968958	1141	3
ANAPC15	5	1.61311	0.024372	0.060348	0.968958	1142	3
MKL2	5	1.61293	0.024382	0.060367	0.968958	1143	3
TMEM33	5	1.61279	0.02439	0.060385	0.968958	1144	1
ZNF519	5	1.61229	0.024418	0.060449	0.968958	1145	2
SNX19	5	1.61192	0.024439	0.060494	0.968958	1146	1
PSMD14	4	1.61192	0.024439	0.050871	0.957713	1147	2
AGBL1	10	1.61176	0.024448	0.073172	0.997273	1148	2
HKR1	10	1.61124	0.024477	0.073251	0.997273	1149	3
ARID3A	5	1.61119	0.02448	0.060578	0.968958	1150	2
PIKFYVE	6	1.61078	0.024503	0.061242	0.968958	1151	3
FAM228B	5	1.61023	0.024534	0.060702	0.968958	1152	3
CCDC106	5	1.6102	0.024536	0.060714	0.968958	1153	2
KRT6A	10	1.61014	0.024539	0.073402	0.997273	1154	2
DSG4	5	1.60884	0.024613	0.0609	0.968958	1155	3
DHCR24	5	1.6082	0.024649	0.060977	0.968958	1156	2
TP53TG3C	5	1.60785	0.024669	0.061018	0.968958	1157	3
RPN1	5	1.6076	0.024683	0.061053	0.968958	1158	3
SYT7	5	1.6076	0.024683	0.061053	0.968958	1159	2
ALKBH5	5	1.60744	0.024692	0.061074	0.968958	1160	3
OR10G7	5	1.60695	0.02472	0.061131	0.968958	1161	2
APOBEC3A	5	1.60621	0.024762	0.061221	0.968958	1162	3
C2orf76	5	1.60588	0.024781	0.061259	0.968958	1163	3
VAMP3	5	1.60532	0.024813	0.061329	0.968958	1164	3
PNLDC1	5	1.60502	0.02483	0.061359	0.968958	1165	1
ZDHHC8	5	1.60476	0.024845	0.061392	0.968958	1166	2
C19orf26	5	1.60434	0.024869	0.061465	0.968958	1167	3
KCNA5	5	1.60417	0.024879	0.061485	0.968958	1168	2
HNRNPLL	5	1.60289	0.024952	0.061642	0.968958	1169	2
MFSD8	5	1.60246	0.024977	0.061697	0.968958	1170	3
RPS27L	5	1.60237	0.024982	0.06171	0.968958	1171	3
CHD8	10	1.60173	0.025019	0.07457	0.997273	1172	1
C1orf105	5	1.60161	0.025026	0.061817	0.968958	1173	1
KIF4A	5	1.60076	0.025075	0.061926	0.968958	1174	1
MORN5	5	1.60041	0.025095	0.061957	0.968958	1175	2
SUPT16H	5	1.60034	0.025099	0.061966	0.968958	1176	3
SEC24A	5	1.59969	0.025137	0.062052	0.968958	1177	3
CYSLTR1	5	1.59886	0.025185	0.06216	0.968958	1178	2
RBP4	5	1.59824	0.025221	0.062238	0.968958	1179	1
CPA1	5	1.59791	0.02524	0.062275	0.968958	1180	3
WDR62	5	1.59739	0.02527	0.06235	0.968958	1181	2
RHEB	5	1.59655	0.025319	0.06247	0.968958	1182	1
GLTSCR1	5	1.59636	0.02533	0.06249	0.968958	1183	3
CNPPD1	9	1.59587	0.025359	0.074666	0.997273	1184	1
CCDC81	5	1.59571	0.025368	0.062576	0.968958	1185	1
OSBPL9	5	1.59484	0.025419	0.062695	0.968958	1186	2
PPP1R12B	5	1.59438	0.025446	0.062761	0.968958	1187	2
ACOT7	5	1.59418	0.025458	0.062792	0.968958	1188	3
UBR5	5	1.59404	0.025466	0.062808	0.968958	1189	2
LOR	5	1.59337	0.025505	0.062918	0.968958	1190	3
NPR1	5	1.5932	0.025515	0.062937	0.968958	1191	1
PANK2	5	1.59285	0.025536	0.062977	0.968958	1192	2
FAM183A	5	1.59269	0.025545	0.062997	0.968958	1193	2
SYNJ1	5	1.59256	0.025553	0.063013	0.968958	1194	3
DNAJC14	5	1.59237	0.025564	0.063036	0.968958	1195	2
DOLK	5	1.59224	0.025572	0.063058	0.968958	1196	2
GCKR	5	1.59156	0.025612	0.063153	0.968958	1197	1
SCGB1D1	4	1.59101	0.025644	0.052767	0.958875	1198	1
PLIN4	5	1.59073	0.025661	0.063266	0.968958	1199	1
TXNL4A	5	1.59054	0.025672	0.063294	0.968958	1200	2
CTSW	5	1.59013	0.025696	0.063345	0.968958	1201	3
YBEY	5	1.59008	0.025699	0.063356	0.968958	1202	2
SGCD	5	1.5899	0.02571	0.063382	0.968958	1203	1
P2RX5	5	1.58981	0.025715	0.06339	0.968958	1204	3
TGIF1	5	1.58917	0.025753	0.063475	0.968958	1205	2
GLIPR2	5	1.58907	0.025759	0.063488	0.968958	1206	1
TSHZ3	5	1.5887	0.025781	0.063533	0.968958	1207	2
CYP7A1	5	1.58757	0.025848	0.063665	0.968958	1208	3
PPM1F	5	1.58734	0.025862	0.063699	0.968958	1209	2
GBP2	5	1.5866	0.025906	0.063794	0.968958	1210	2
SNF8	5	1.58652	0.025911	0.063806	0.968958	1211	3
C10orf129	4	1.58647	0.025914	0.053185	0.959309	1212	2
HSPG2	5	1.58611	0.025935	0.063868	0.968958	1213	2
SPTBN2	5	1.58596	0.025944	0.063886	0.968958	1214	2
TMCO4	5	1.58571	0.025959	0.063918	0.968958	1215	3
C9orf40	5	1.58551	0.025971	0.063948	0.968958	1216	2
TRIM55	5	1.58536	0.02598	0.063968	0.968958	1217	2
PNLIP	5	1.58498	0.026003	0.064023	0.968958	1218	1
TRIM56	5	1.58444	0.026035	0.064092	0.968958	1219	3
EVI5	5	1.58419	0.02605	0.064125	0.968958	1220	3
YARS2	4	1.58379	0.026074	0.053422	0.959309	1221	1
HGSNAT	5	1.58356	0.026088	0.064216	0.968958	1222	3
ADCY3	5	1.58334	0.026101	0.064242	0.968958	1223	1
GLTP	5	1.58253	0.02615	0.064348	0.968958	1224	1
DCAF7	5	1.58203	0.02618	0.06442	0.968958	1225	3
REEP5	5	1.58172	0.026199	0.064465	0.968958	1226	2
ADSS	5	1.58172	0.026199	0.064465	0.968958	1227	2
NSDHL	5	1.5814	0.026218	0.064511	0.968958	1228	3
UBQLN1	5	1.58092	0.026247	0.064575	0.968958	1229	3
HIST1H4C	5	1.5809	0.026248	0.064575	0.968958	1230	2
KCTD4	5	1.58044	0.026276	0.064644	0.968958	1231	3
EXOSC5	5	1.58036	0.026281	0.064658	0.968958	1232	3
NEU2	5	1.58004	0.0263	0.064699	0.968958	1233	2
COLQ	5	1.57996	0.026305	0.064711	0.968958	1234	3
CCDC174	4	1.57978	0.026316	0.0538	0.959803	1235	2
FRRS1	5	1.57853	0.026392	0.064906	0.970317	1236	2
SFTA3	5	1.57808	0.026419	0.064969	0.970483	1237	2
CHD2	10	1.57782	0.026435	0.078057	0.997273	1238	4
DLX5	5	1.57538	0.026584	0.065261	0.972912	1239	2
GABARAP	5	1.57528	0.02659	0.065268	0.972912	1240	1
FAM136A	5	1.57432	0.026649	0.065361	0.972912	1241	2
RANGAP1	4	1.57351	0.026699	0.05439	0.959803	1242	2
PALM3	4	1.57284	0.02674	0.054451	0.959803	1243	2
NUFIP1	5	1.57148	0.026824	0.065648	0.974381	1244	2
ZNF436	10	1.57072	0.026871	0.079135	0.997273	1245	3
BCL2L14	10	1.57055	0.026881	0.079156	0.997273	1246	3
VPS13C	5	1.57052	0.026883	0.065733	0.974858	1247	2
NAA25	5	1.56973	0.026932	0.065809	0.975216	1248	2
HUS1	4	1.56951	0.026946	0.054777	0.960652	1249	2
MED9	4	1.56833	0.027019	0.054891	0.9616	1250	2
MATN3	5	1.56817	0.027029	0.065948	0.976509	1251	1
C1orf194	10	1.56796	0.027042	0.079519	0.997273	1252	4
C6orf15	5	1.56671	0.02712	0.06608	0.977682	1253	2
CHST14	5	1.5636	0.027315	0.066367	0.979671	1254	2
ZNF33A	5	1.56349	0.027322	0.066377	0.979671	1255	2
TEX15	5	1.56271	0.027371	0.066447	0.979671	1256	2
SSUH2	5	1.56168	0.027436	0.066535	0.979671	1257	2
RPL7L1	4	1.56144	0.027451	0.055575	0.962763	1258	2
TGS1	5	1.56109	0.027473	0.066582	0.979671	1259	2
BLCAP	5	1.56005	0.027539	0.066676	0.979859	1260	2
PSEN2	5	1.55961	0.027567	0.066708	0.979859	1261	2
TMEM246	4	1.5589	0.027612	0.055848	0.964903	1262	2
GSDMD	5	1.55809	0.027664	0.066847	0.980365	1263	1
LAMTOR1	5	1.55755	0.027698	0.066892	0.980365	1264	2
RCOR2	5	1.55653	0.027763	0.066988	0.980567	1265	2
STIM1	5	1.55503	0.027859	0.067121	0.981405	1266	2
RTP4	5	1.55351	0.027957	0.067254	0.982582	1267	2
FAM192A	5	1.55276	0.028005	0.067326	0.982859	1268	2
NDUFA7	5	1.55125	0.028103	0.067476	0.983088	1269	1
CISD2	5	1.55112	0.028111	0.067485	0.983088	1270	2
CEP72	5	1.55098	0.02812	0.067501	0.983088	1271	2
OR4A16	5	1.55024	0.028168	0.067563	0.983088	1272	2
HIST2H3D	5	1.54974	0.028201	0.067605	0.983088	1273	2
E2F8	5	1.54824	0.028298	0.067738	0.9835	1274	2
TAF1D	10	1.54774	0.028331	0.082657	0.999816	1275	2
ACTB	5	1.54749	0.028347	0.067811	0.98379	1276	2
TMED4	5	1.54674	0.028396	0.067872	0.98391	1277	2
SH3BP5L	5	1.54599	0.028445	0.067949	0.984261	1278	1
SOGA2	5	1.54526	0.028493	0.068008	0.984342	1279	2
PAF1	3	1.54464	0.028534	0.052614	0.958875	1280	2
RNF222	5	1.54377	0.028591	0.068143	0.985536	1281	1
HAUS6	3	1.54265	0.028665	0.052842	0.958875	1282	2
LIPH	5	1.54157	0.028736	0.068352	0.985611	1283	2
FAM171A2	5	1.54156	0.028737	0.068357	0.985611	1284	1
TRIM29	10	1.54127	0.028756	0.083663	0.999816	1285	4
DLG1	5	1.54115	0.028764	0.0684	0.985611	1286	2
MT1E	5	1.54082	0.028786	0.068429	0.985611	1287	2
TARDBP	5	1.54043	0.028812	0.068465	0.985611	1288	2
TMX1	5	1.53942	0.028879	0.068558	0.986194	1289	2
FAM92B	5	1.53843	0.028945	0.068658	0.986243	1290	2
GTF2B	5	1.53813	0.028965	0.068689	0.986243	1291	2
STRN4	1	1.53741	0.029013	0.028943	0.861236	1292	1
CRCP	5	1.53715	0.02903	0.068777	0.986243	1293	1
SRP72	5	1.53644	0.029078	0.068851	0.986243	1294	1
EEF2K	5	1.53614	0.029098	0.068879	0.986243	1295	2
RPS10	4	1.53362	0.029267	0.058397	0.968958	1296	2
NUDC	5	1.53281	0.029322	0.069182	0.989012	1297	2
MBNL1	5	1.53136	0.02942	0.069301	0.989012	1298	1
SLC25A25	5	1.5303	0.029492	0.069405	0.989012	1299	2
FCAMR	5	1.52993	0.029517	0.069441	0.989012	1300	1
EFEMP1	5	1.52931	0.029559	0.069502	0.989012	1301	2
GOT1	5	1.52921	0.029566	0.069514	0.989012	1302	1
NUFIP2	5	1.5285	0.029614	0.06958	0.989012	1303	2
C7orf63	5	1.52833	0.029626	0.069597	0.989012	1304	2
DHX9	5	1.52776	0.029665	0.069653	0.989012	1305	2
DHX30	8	1.52732	0.029695	0.079973	0.997273	1306	2
RHOXF2	5	1.52635	0.029761	0.069787	0.989012	1307	1
PDZRN3	5	1.52606	0.029781	0.069823	0.989012	1308	2
RPL26L1	5	1.52494	0.029858	0.069935	0.989012	1309	2
MT2A	5	1.52459	0.029882	0.069968	0.989012	1310	1
PRR9	5	1.52452	0.029887	0.069974	0.989012	1311	2
FANK1	5	1.52352	0.029956	0.070079	0.989012	1312	1
TXNDC2	5	1.52326	0.029974	0.070104	0.989012	1313	2
PRELP	5	1.52284	0.030003	0.070146	0.989012	1314	2
USP38	5	1.52211	0.030053	0.070213	0.989012	1315	1
ZNF787	5	1.52185	0.030071	0.070239	0.989012	1316	2
AGFG1	5	1.52073	0.030149	0.070355	0.989901	1317	2
SCUBE1	5	1.52001	0.030199	0.070421	0.990088	1318	2
BCL10	5	1.51668	0.030431	0.070745	0.993898	1319	2
SACS	10	1.5161	0.030472	0.087761	0.999816	1320	3
ATP13A2	5	1.51529	0.030529	0.070884	0.994577	1321	2
SYNPO2	5	1.51513	0.03054	0.070909	0.994577	1322	1
C5orf30	5	1.51473	0.030568	0.070958	0.994577	1323	2
TMEM123	5	1.51306	0.030686	0.071135	0.995231	1324	1
ARHGAP11A	5	1.51279	0.030705	0.07116	0.995231	1325	2
EIF3A	2	1.51125	0.030814	0.048756	0.950521	1326	1
CDIPT	5	1.50963	0.030929	0.07147	0.99676	1327	1
ZNF619	5	1.50892	0.03098	0.071539	0.99676	1328	2
LUC7L2	5	1.5079	0.031053	0.071638	0.99676	1329	2
NFU1	5	1.50759	0.031075	0.071673	0.99676	1330	1
SYT1	10	1.50728	0.031097	0.089206	0.999816	1331	2
C12orf57	5	1.5069	0.031124	0.071733	0.99676	1332	2
BEND6	5	1.50672	0.031137	0.07175	0.99676	1333	2
FBXO10	4	1.50501	0.03126	0.061474	0.968958	1334	2
EFCAB11	5	1.50487	0.03127	0.071938	0.997273	1335	1
MAP3K7CL	10	1.5039	0.03134	0.089798	0.999816	1336	3
MREG	4	1.50379	0.031348	0.061609	0.968958	1337	1
TP53TG5	5	1.50353	0.031367	0.072076	0.997273	1338	1
SLC25A22	5	1.50343	0.031374	0.072087	0.997273	1339	2
ZBTB14	5	1.50285	0.031416	0.072143	0.997273	1340	1
SLFN13	5	1.50217	0.031465	0.07222	0.997273	1341	2
RGS18	5	1.50192	0.031483	0.072239	0.997273	1342	2
MYH4	5	1.50151	0.031513	0.072285	0.997273	1343	1
IL1RN	10	1.50137	0.031523	0.090215	0.999816	1344	3
GFRA2	5	1.50084	0.031562	0.072354	0.997273	1345	2
GPR142	5	1.50044	0.031591	0.072401	0.997273	1346	2
DEFB114	5	1.50002	0.031621	0.072445	0.997273	1347	2
ACVR1B	5	1.4992	0.031681	0.072532	0.997273	1348	2
TMEM100	9	1.49796	0.031772	0.090941	0.999816	1349	3
CHUK	5	1.49785	0.03178	0.072677	0.997273	1350	2
ID1	5	1.49684	0.031854	0.072796	0.997273	1351	1
RSBN1	5	1.49485	0.032	0.072998	0.997273	1352	1
HLA-G	4	1.4947	0.032011	0.062556	0.968958	1353	1
HSPA1A	10	1.49467	0.032013	0.091379	0.999816	1354	2
LGALS12	5	1.49354	0.032097	0.073132	0.997273	1355	1
DNER	5	1.49223	0.032194	0.073261	0.997273	1356	2
KCNC1	10	1.49194	0.032215	0.091869	0.999816	1357	1
XKR7	5	1.49162	0.032239	0.073323	0.997273	1358	2
PTGR1	5	1.49156	0.032243	0.07333	0.997273	1359	1
OPALIN	5	1.49108	0.032279	0.073381	0.997273	1360	2
RAPGEF2	5	1.49095	0.032289	0.073399	0.997273	1361	2
KNOP1	5	1.49092	0.032291	0.073405	0.997273	1362	1
APEX2	5	1.48896	0.032437	0.073605	0.997273	1363	1
SLC51B	5	1.4884	0.032479	0.073665	0.997273	1364	2
ZGLP1	5	1.488	0.032509	0.073708	0.997273	1365	2
TRIM60	5	1.48766	0.032534	0.073747	0.997273	1366	1
DUSP23	5	1.4876	0.032539	0.073754	0.997273	1367	2
ELFN1	10	1.48752	0.032545	0.092659	0.999816	1368	4
C16orf45	4	1.48737	0.032556	0.063425	0.968958	1369	1
PTPN22	5	1.48701	0.032583	0.073823	0.997273	1370	1
CXCR3	5	1.48636	0.032632	0.073882	0.997273	1371	1
COL4A6	10	1.48632	0.032635	0.09288	0.999816	1372	4
PTPN21	5	1.48507	0.032729	0.074038	0.997273	1373	1
TCEAL3	5	1.48358	0.032841	0.074215	0.997273	1374	2
BRCA1	5	1.48319	0.032871	0.074253	0.997273	1375	2
HTATIP2	5	1.48212	0.032952	0.074374	0.997273	1376	2
EVL	10	1.48207	0.032956	0.093647	0.999816	1377	4
CD2	5	1.48185	0.032972	0.074408	0.997273	1378	1
TAZ	3	1.48064	0.033064	0.060134	0.968958	1379	1
GTPBP8	5	1.4804	0.033083	0.074582	0.997273	1380	2
OTUB1	5	1.47931	0.033166	0.074692	0.997273	1381	1
CCM2L	10	1.47905	0.033186	0.094193	0.999816	1382	3
CLEC9A	10	1.47873	0.03321	0.094252	0.999816	1383	2
DUSP12	5	1.47867	0.033215	0.074762	0.997273	1384	1
ZKSCAN1	5	1.47801	0.033265	0.074825	0.997273	1385	2
TBRG1	5	1.47676	0.033361	0.074963	0.997273	1386	1
SMOC2	4	1.47659	0.033374	0.064684	0.968958	1387	2
ZG16	5	1.47655	0.033377	0.074992	0.997273	1388	2
RSBN1L	5	1.47614	0.033409	0.075038	0.997273	1389	1
RING1	5	1.4755	0.033458	0.075099	0.997273	1390	1
LRP12	5	1.47488	0.033506	0.075166	0.997273	1391	1
BUD31	5	1.47362	0.033603	0.075293	0.997273	1392	2
PRH1	5	1.47299	0.033652	0.075358	0.997273	1393	1
THRAP3	5	1.47237	0.0337	0.075423	0.997273	1394	1
HEATR5B	5	1.47174	0.033749	0.075492	0.997273	1395	1
SLC3A1	5	1.47169	0.033753	0.075496	0.997273	1396	2
TENM1	5	1.47116	0.033794	0.075549	0.997273	1397	2
AHI1	5	1.47111	0.033798	0.075553	0.997273	1398	1
ESPNL	10	1.47106	0.033802	0.095704	0.999816	1399	3
BPIFB6	4	1.47038	0.033855	0.065417	0.972912	1400	2
RBMX	4	1.47006	0.03388	0.065445	0.972912	1401	2
FMO5	5	1.46925	0.033943	0.075756	0.997273	1402	1
ANKRD18B	4	1.46906	0.033958	0.065573	0.974045	1403	1
MT1F	5	1.46862	0.033992	0.07583	0.997273	1404	2
KRTAP10-12	5	1.46841	0.034009	0.075858	0.997273	1405	2
PSMB3	5	1.46801	0.03404	0.075898	0.997273	1406	2
EVI2B	5	1.46739	0.034089	0.075974	0.997273	1407	1
IRF2BP2	10	1.46684	0.034132	0.096486	0.999816	1408	4
TMEM178B	5	1.46677	0.034137	0.076036	0.997273	1409	1
SAMHD1	5	1.46671	0.034142	0.076041	0.997273	1410	2
FAM9B	10	1.46472	0.034299	0.096875	0.999816	1411	3
LRPAP1	5	1.4643	0.034332	0.07632	0.997273	1412	1
PRB1	3	1.46405	0.034352	0.062273	0.968958	1413	1
SRCRB4D	4	1.46363	0.034385	0.066261	0.979582	1414	1
MSH2	5	1.46308	0.034429	0.076458	0.997273	1415	2
MRPL20	5	1.46295	0.034439	0.076469	0.997273	1416	2
TRIM2	5	1.46204	0.034511	0.076587	0.997273	1417	2
AP1G2	5	1.46151	0.034553	0.076639	0.997273	1418	2
CXCL10	5	1.46125	0.034574	0.076672	0.997273	1419	1
TAS2R46	5	1.46112	0.034584	0.076685	0.997273	1420	2
CYB5R2	5	1.461	0.034594	0.076702	0.997273	1421	2
BBOX1	9	1.46057	0.034628	0.09743	0.999816	1422	1
C3orf35	17	1.46048	0.034635	0.11824	0.999816	1423	3
SCCPDH	5	1.4601	0.034666	0.076808	0.997273	1424	2
MAN1A1	5	1.45971	0.034697	0.076847	0.997273	1425	2
ZCCHC11	5	1.45945	0.034718	0.076874	0.997273	1426	2
CASP6	5	1.4592	0.034738	0.076894	0.997273	1427	2
GBF1	3	1.459	0.034754	0.062946	0.968958	1428	2
KLRB1	5	1.45867	0.03478	0.07696	0.997273	1429	2
CYP17A1	5	1.45821	0.034817	0.077021	0.997273	1430	1
RIMBP2	5	1.45761	0.034865	0.077091	0.997273	1431	2
SSRP1	5	1.45712	0.034904	0.077148	0.997273	1432	2
ARHGEF10L	5	1.457	0.034914	0.077165	0.997273	1433	1
PPIP5K2	5	1.4552	0.035059	0.077346	0.997273	1434	1
RXRB	5	1.454	0.035156	0.077506	0.997273	1435	1
GPR119	5	1.45379	0.035173	0.077531	0.997273	1436	2
RPGRIP1	10	1.4532	0.035221	0.099073	0.999816	1437	3
TBC1D2	5	1.4522	0.035302	0.07774	0.997273	1438	2
C6orf163	4	1.45191	0.035326	0.067673	0.983317	1439	2
PRAME	5	1.45161	0.03535	0.077801	0.997273	1440	2
KLHL13	5	1.45101	0.035399	0.077874	0.997273	1441	1
APOB	5	1.45042	0.035447	0.077933	0.997273	1442	1
DNALI1	5	1.44983	0.035495	0.078013	0.997273	1443	2
AK8	5	1.44923	0.035544	0.078084	0.997273	1444	1
GHDC	5	1.44918	0.035548	0.078088	0.997273	1445	2
VPS51	5	1.44805	0.035641	0.078223	0.997273	1446	2
DARC	5	1.44687	0.035738	0.078371	0.997273	1447	1
C9orf170	4	1.44677	0.035746	0.068311	0.985611	1448	2
RPL36	5	1.44627	0.035787	0.078445	0.997273	1449	1
ZPLD1	10	1.44627	0.035787	0.10041	0.999816	1450	2
SPAG6	5	1.44569	0.035835	0.078526	0.997273	1451	1
HAUS4	3	1.44557	0.035845	0.064777	0.969158	1452	2
UBALD1	5	1.44538	0.035861	0.078562	0.997273	1453	2
NOL8	5	1.44452	0.035932	0.078673	0.997273	1454	1
TRIM39	5	1.44411	0.035966	0.078718	0.997273	1455	2
SEMA3B	10	1.44408	0.035968	0.10085	0.999816	1456	4
GPI	5	1.44393	0.035981	0.078741	0.997273	1457	2
SMARCB1	10	1.44384	0.035988	0.1009	0.999816	1458	1
OR1J1	5	1.44348	0.036018	0.078791	0.997273	1459	2
GEMIN7	5	1.44335	0.036029	0.078811	0.997273	1460	2
ZNF878	5	1.44323	0.036039	0.078825	0.997273	1461	2
REG3A	5	1.44235	0.036112	0.078928	0.997273	1462	2
MDM2	5	1.44222	0.036123	0.078948	0.997273	1463	2
ZNF676	5	1.44218	0.036126	0.078952	0.997273	1464	2
GPR155	4	1.44158	0.036176	0.068992	0.987111	1465	2
AGPAT9	5	1.44134	0.036196	0.079046	0.997273	1466	2
COPS6	5	1.44102	0.036223	0.079087	0.997273	1467	1
HAS1	10	1.44057	0.03626	0.10155	0.999816	1468	2
TXNL1	5	1.44045	0.03627	0.079151	0.997273	1469	2
SYT4	5	1.44032	0.036281	0.079161	0.997273	1470	2
SNX9	5	1.43945	0.036354	0.07927	0.997273	1471	2
MAN1A2	5	1.43928	0.036368	0.079292	0.997273	1472	1
METAP1	5	1.4387	0.036417	0.07936	0.997273	1473	1
MCCC2	5	1.43831	0.036449	0.079411	0.997273	1474	2
ZP3	5	1.43812	0.036465	0.079431	0.997273	1475	1
MRPL34	2	1.43811	0.036466	0.053592	0.959309	1476	1
HIST1H2BB	5	1.43781	0.036491	0.079466	0.997273	1477	2
MBD3L4	2	1.43765	0.036505	0.053629	0.959309	1478	1
ZSCAN22	5	1.43754	0.036514	0.079506	0.997273	1479	1
AGA	5	1.43718	0.036544	0.079543	0.997273	1480	2
SCO2	5	1.43582	0.036659	0.079703	0.997273	1481	1
C1QTNF9	10	1.43576	0.036664	0.10251	0.999816	1482	3
B3GALT1	5	1.43568	0.036671	0.079723	0.997273	1483	2
PCDHGB2	5	1.43493	0.036734	0.07982	0.997273	1484	2
PLEKHM1	5	1.43467	0.036756	0.079843	0.997273	1485	2
CCDC53	5	1.43419	0.036797	0.079902	0.997273	1486	2
CLEC10A	5	1.43406	0.036808	0.079922	0.997273	1487	2
FAM160B1	4	1.43386	0.036825	0.070015	0.989012	1488	2
TUFT1	4	1.43375	0.036834	0.070034	0.989012	1489	1
APBB2	5	1.43353	0.036853	0.079988	0.997273	1490	1
GNL2	5	1.43296	0.036901	0.080057	0.997273	1491	1
STRN	5	1.43239	0.03695	0.080115	0.997273	1492	2
LRRC73	5	1.43145	0.03703	0.080225	0.997273	1493	2
SMIM13	5	1.43132	0.037041	0.080235	0.997273	1494	2
KCNK7	5	1.43125	0.037047	0.080237	0.997273	1495	1
KRTCAP3	5	1.4307	0.037094	0.080307	0.997273	1496	2
SHF	8	1.43051	0.03711	0.094015	0.999816	1497	3
SLC16A3	5	1.4297	0.037179	0.080425	0.997273	1498	2
UBE2Q1	5	1.42957	0.03719	0.080443	0.997273	1499	2
TAF1L	5	1.42955	0.037192	0.080447	0.997273	1500	1
RPL31	3	1.42927	0.037216	0.067011	0.980567	1501	1
FAM86A	5	1.42842	0.037289	0.08057	0.997605	1502	1
SLC6A4	5	1.42834	0.037296	0.080581	0.997605	1503	2
PPP2R5A	5	1.42673	0.037434	0.080779	0.999399	1504	1
NDUFAF4	5	1.42618	0.037482	0.080846	0.999538	1505	1
EIF1B	5	1.42561	0.037531	0.080925	0.999538	1506	1
ZNF600	5	1.42537	0.037552	0.080951	0.999538	1507	2
LCMT2	5	1.42394	0.037676	0.081126	0.999816	1508	1
BCAS3	5	1.42338	0.037724	0.081197	0.999816	1509	1
C4orf29	4	1.42291	0.037765	0.071462	0.99676	1510	2
KRTAP21-2	5	1.42242	0.037808	0.081315	0.999816	1511	2
AP3D1	5	1.42205	0.03784	0.081365	0.999816	1512	2
SF1	5	1.4217	0.03787	0.081401	0.999816	1513	1
CLUL1	10	1.42115	0.037918	0.10556	0.999816	1514	3
MUM1L1	5	1.42061	0.037966	0.081535	0.999816	1515	1
TMCO2	5	1.42033	0.03799	0.081577	0.999816	1516	2
LPP	10	1.42016	0.038005	0.10574	0.999816	1517	3
CRTAP	5	1.42005	0.038015	0.081617	0.999816	1518	1
SLC39A4	10	1.42005	0.038015	0.10577	0.999816	1519	1
BHLHE41	5	1.41984	0.038033	0.081641	0.999816	1520	2
FBXO45	5	1.41959	0.038055	0.081672	0.999816	1521	2
OR1J2	5	1.41895	0.038111	0.081755	0.999816	1522	1
BDP1	5	1.41785	0.038208	0.081893	0.999816	1523	1
N6AMT1	5	1.41763	0.038227	0.081922	0.999816	1524	2
COL8A1	3	1.41741	0.038246	0.068736	0.986243	1525	2
HSPA5	5	1.41729	0.038257	0.081954	0.999816	1526	2
LRRC14	10	1.4172	0.038265	0.10634	0.999816	1527	2
ENOX1	5	1.4169	0.038291	0.082009	0.999816	1528	2
KDM1A	5	1.4162	0.038353	0.082098	0.999816	1529	2
HTR1F	5	1.4151	0.03845	0.082246	0.999816	1530	1
ZFYVE19	4	1.41489	0.038469	0.072565	0.997273	1531	2
PIGV	5	1.41362	0.038582	0.082412	0.999816	1532	2
HNRNPM	10	1.41349	0.038593	0.10713	0.999816	1533	3
C11orf73	5	1.41347	0.038595	0.082431	0.999816	1534	1
TEX30	5	1.41313	0.038625	0.082477	0.999816	1535	2
WDR72	5	1.41292	0.038644	0.082498	0.999816	1536	2
USP46	5	1.41215	0.038712	0.08259	0.999816	1537	2
MFAP5	4	1.41147	0.038773	0.073017	0.997273	1538	1
SRC	4	1.41144	0.038776	0.073021	0.997273	1539	2
PPP1R12A	5	1.4113	0.038788	0.0827	0.999816	1540	2
PTRH2	5	1.41046	0.038863	0.082805	0.999816	1541	2
RBM17	6	1.41037	0.038871	0.091993	0.999816	1542	3
ZNF90	5	1.41034	0.038874	0.082821	0.999816	1543	2
ANXA10	5	1.40949	0.03895	0.082938	0.999816	1544	2
CEP120	5	1.40877	0.039015	0.083033	0.999816	1545	2
LTA	5	1.4084	0.039048	0.083077	0.999816	1546	2
COPS5	5	1.40752	0.039127	0.083187	0.999816	1547	1
DRAM2	5	1.40732	0.039145	0.083206	0.999816	1548	2
NHSL2	5	1.40564	0.039297	0.083415	0.999816	1549	2
MAMSTR	10	1.40554	0.039306	0.10881	0.999816	1550	2
CPLX1	5	1.40528	0.03933	0.083465	0.999816	1551	2
TTLL7	5	1.40432	0.039417	0.083599	0.999816	1552	1
ASPA	4	1.40372	0.039471	0.074082	0.997273	1553	1
H3F3B	5	1.40325	0.039514	0.083739	0.999816	1554	1
TPM1	10	1.40308	0.039529	0.10934	0.999816	1555	2
HTR2B	5	1.40272	0.039562	0.083803	0.999816	1556	1
GGNBP2	5	1.40263	0.03957	0.083816	0.999816	1557	2
GYPE	3	1.40221	0.039609	0.071007	0.994577	1558	1
ABCC9	5	1.4022	0.03961	0.083881	0.999816	1559	1
USF1	5	1.40216	0.039613	0.083884	0.999816	1560	2
SLX4	4	1.40202	0.039626	0.07432	0.997273	1561	1
BMP4	10	1.40182	0.039644	0.10962	0.999816	1562	3
TIPARP	5	1.40166	0.039659	0.083943	0.999816	1563	2
TET1	4	1.40075	0.039742	0.074493	0.997273	1564	1
SEC31B	5	1.40061	0.039755	0.084068	0.999816	1565	1
DUSP11	5	1.40037	0.039777	0.084095	0.999816	1566	2
KARS	4	1.40032	0.039781	0.074558	0.997273	1567	1
ACBD3	5	1.40007	0.039804	0.084139	0.999816	1568	1
S100A1	10	1.40001	0.03981	0.11001	0.999816	1569	4
WDR34	5	1.39989	0.039821	0.084166	0.999816	1570	2
ZNF560	5	1.39903	0.0399	0.084275	0.999816	1571	2
BCORL1	5	1.39893	0.039909	0.084289	0.999816	1572	2
ANKRD30B	5	1.39881	0.03992	0.084309	0.999816	1573	2
C1orf109	10	1.39858	0.039941	0.11034	0.999816	1574	1
POU4F3	5	1.39858	0.039941	0.084336	0.999816	1575	2
RGP1	5	1.39797	0.039997	0.08441	0.999816	1576	2
RIOK3	5	1.39786	0.040007	0.084429	0.999816	1577	2
RIPPLY3	5	1.39745	0.040045	0.084484	0.999816	1578	1
C16orf90	4	1.39738	0.040052	0.074974	0.997273	1579	1
POLR2A	4	1.39654	0.040129	0.07511	0.997273	1580	1
LRP8	5	1.39584	0.040194	0.084704	0.999816	1581	2
SLC25A28	5	1.39501	0.040271	0.084802	0.999816	1582	2
DSTYK	5	1.39432	0.040335	0.084892	0.999816	1583	1
GDF2	5	1.39418	0.040348	0.084903	0.999816	1584	2
ZNF853	9	1.39394	0.04037	0.10752	0.999816	1585	2
ERN2	5	1.3938	0.040383	0.084946	0.999816	1586	2
MTMR4	10	1.39334	0.040426	0.11148	0.999816	1587	3
TMEM209	5	1.39311	0.040447	0.085031	0.999816	1588	2
ARMC12	4	1.39282	0.040474	0.075627	0.997273	1589	2
FLYWCH1	5	1.39276	0.04048	0.085081	0.999816	1590	1
C20orf201	5	1.39229	0.040524	0.085143	0.999816	1591	2
FAM211B	5	1.39121	0.040625	0.085288	0.999816	1592	1
FAM195A	5	1.38934	0.0408	0.085531	0.999816	1593	2
ZNF23	10	1.38891	0.04084	0.11244	0.999816	1594	3
MYBBP1A	5	1.38864	0.040866	0.085621	0.999816	1595	2
LZTS1	5	1.38852	0.040877	0.085638	0.999816	1596	2
RNF122	5	1.38813	0.040914	0.085683	0.999816	1597	1
POP7	5	1.38761	0.040963	0.085757	0.999816	1598	1
BOD1L1	9	1.38723	0.040999	0.10864	0.999816	1599	3
ERMP1	5	1.38723	0.040999	0.085807	0.999816	1600	2
ZCCHC2	5	1.38711	0.04101	0.085826	0.999816	1601	2
CHST13	5	1.38659	0.041059	0.085892	0.999816	1602	1
PYCR2	5	1.38559	0.041154	0.086023	0.999816	1603	2
TUBA3C	5	1.38557	0.041156	0.086025	0.999816	1604	2
GPR31	5	1.38547	0.041165	0.086035	0.999816	1605	2
FTH1	5	1.38455	0.041252	0.086168	0.999816	1606	2
BCMO1	5	1.38404	0.041301	0.086243	0.999816	1607	1
OR4C13	5	1.38353	0.041349	0.086317	0.999816	1608	1
VMO1	5	1.3822	0.041476	0.086498	0.999816	1609	2
SLC6A7	5	1.38201	0.041494	0.086523	0.999816	1610	2
ADK	10	1.38159	0.041535	0.11406	0.999816	1611	3
WNT8B	5	1.38101	0.04159	0.086661	0.999816	1612	1
XKR3	5	1.38051	0.041638	0.086723	0.999816	1613	2
MED7	4	1.38051	0.041638	0.077377	0.997273	1614	1
PICK1	5	1.38	0.041687	0.086782	0.999816	1615	2
TAC3	4	1.37977	0.041709	0.077479	0.997273	1616	2
MESP2	5	1.3795	0.041735	0.086849	0.999816	1617	1
GIMAP6	4	1.37949	0.041736	0.077528	0.997273	1618	2
CLPB	5	1.379	0.041783	0.086919	0.999816	1619	1
RGS1	4	1.37876	0.041806	0.077636	0.997273	1620	2
CMA1	5	1.3785	0.041831	0.086996	0.999816	1621	2
VPS72	5	1.37802	0.041877	0.087066	0.999816	1622	2
P2RY12	5	1.378	0.041879	0.087068	0.999816	1623	1
FPGS	5	1.3775	0.041928	0.087125	0.999816	1624	1
SECTM1	5	1.37732	0.041945	0.087147	0.999816	1625	2
TIMD4	10	1.37716	0.04196	0.11505	0.999816	1626	1
SAMSN1	4	1.3769	0.041986	0.077897	0.997273	1627	1
ANO7	5	1.37601	0.042072	0.087326	0.999816	1628	2
TCHP	5	1.37593	0.042079	0.087335	0.999816	1629	2
BRAF	4	1.3757	0.042102	0.078062	0.997273	1630	1
RPL7A	2	1.37489	0.04218	0.058612	0.968958	1631	1
WDR18	5	1.37451	0.042217	0.087528	0.999816	1632	1
MMP16	5	1.37353	0.042313	0.087666	0.999816	1633	1
BRMS1L	5	1.37328	0.042337	0.087701	0.999816	1634	2
POLR2F	5	1.37253	0.04241	0.0878	0.999816	1635	1
BNIP1	3	1.37208	0.042454	0.075703	0.997273	1636	2
CDH6	5	1.37167	0.042494	0.087919	0.999816	1637	2
ADAM11	5	1.37133	0.042528	0.087968	0.999816	1638	2
CD36	5	1.37105	0.042555	0.088001	0.999816	1639	2
STXBP3	4	1.37054	0.042605	0.078856	0.997273	1640	1
SCIN	5	1.37007	0.042651	0.088146	0.999816	1641	1
H2AFV	5	1.36958	0.042699	0.08822	0.999816	1642	1
FREM2	5	1.36938	0.042719	0.088245	0.999816	1643	2
RGS20	10	1.36929	0.042728	0.11682	0.999816	1644	2
GART	4	1.36929	0.042728	0.079047	0.997273	1645	2
TTC21B	5	1.36927	0.04273	0.088263	0.999816	1646	2
CLEC2D	4	1.3691	0.042746	0.079074	0.997273	1647	2
MAP3K6	5	1.36909	0.042747	0.088288	0.999816	1648	2
ARHGAP15	5	1.36881	0.042775	0.088324	0.999816	1649	2
ATRX	5	1.36846	0.042809	0.088369	0.999816	1650	2
TNP1	5	1.36766	0.042888	0.088488	0.999816	1651	2
TBC1D8B	5	1.36762	0.042892	0.088493	0.999816	1652	1
TF	10	1.36753	0.042901	0.11724	0.999816	1653	4
GLMN	5	1.36714	0.04294	0.088567	0.999816	1654	1
MYH2	5	1.36686	0.042967	0.088599	0.999816	1655	2
AAGAB	5	1.36665	0.042988	0.088634	0.999816	1656	1
CUL4B	5	1.36663	0.04299	0.088635	0.999816	1657	2
AIFM1	5	1.36519	0.043133	0.088833	0.999816	1658	1
SLC9A3	5	1.36471	0.043181	0.088898	0.999816	1659	2
BPIFA3	5	1.36424	0.043227	0.088972	0.999816	1660	2
RAI2	5	1.36422	0.043229	0.088976	0.999816	1661	1
NPPA	5	1.36374	0.043277	0.089049	0.999816	1662	2
IL36B	4	1.36351	0.0433	0.079901	0.997273	1663	1
DEFB104B	4	1.36312	0.043339	0.079964	0.997273	1664	1
RPAP1	4	1.36235	0.043416	0.080084	0.997273	1665	1
TM2D3	5	1.36229	0.043422	0.089264	0.999816	1666	2
EFNB3	5	1.36197	0.043454	0.089312	0.999816	1667	2
SNX21	5	1.36181	0.04347	0.089329	0.999816	1668	1
OR5M1	5	1.36174	0.043477	0.089338	0.999816	1669	2
MECOM	5	1.36163	0.043488	0.089363	0.999816	1670	2
LOC643669	5	1.36133	0.043518	0.089405	0.999816	1671	2
NDN	5	1.36118	0.043533	0.089423	0.999816	1672	2
SURF2	5	1.36036	0.043615	0.089544	0.999816	1673	1
AMHR2	5	1.35941	0.043711	0.089685	0.999816	1674	1
ZNF175	5	1.35869	0.043783	0.089799	0.999816	1675	2
SQSTM1	5	1.35846	0.043807	0.089832	0.999816	1676	1
KLF5	5	1.35835	0.043818	0.089848	0.999816	1677	2
RDH12	5	1.35801	0.043852	0.089889	0.999816	1678	2
RCAN1	5	1.35798	0.043855	0.089892	0.999816	1679	1
MCAT	5	1.35751	0.043903	0.089962	0.999816	1680	1
NOTCH2NL	5	1.35734	0.04392	0.089995	0.999816	1681	2
TDP2	5	1.35702	0.043952	0.090039	0.999816	1682	1
LOC286238	5	1.35576	0.04408	0.090229	0.999816	1683	2
ARL3	4	1.35545	0.044111	0.081161	0.999816	1684	1
KATNA1	5	1.35542	0.044114	0.090281	0.999816	1685	2
ABHD11	5	1.35513	0.044144	0.090329	0.999816	1686	1
LRG1	5	1.35466	0.044192	0.090392	0.999816	1687	1
KIAA0247	5	1.35453	0.044205	0.090411	0.999816	1688	2
ASCL2	5	1.35385	0.044274	0.09051	0.999816	1689	2
DYDC2	4	1.35343	0.044317	0.081481	0.999816	1690	2
MZT2B	5	1.35276	0.044385	0.090668	0.999816	1691	1
IGF1	5	1.35228	0.044434	0.090741	0.999816	1692	2
ZC3H4	10	1.35209	0.044454	0.12088	0.999816	1693	3
SIPA1L3	4	1.35184	0.04448	0.081707	0.999816	1694	2
C3orf30	5	1.35041	0.044626	0.091006	0.999816	1695	1
SKIV2L2	5	1.35028	0.04464	0.091023	0.999816	1696	2
MAGEA12	4	1.34979	0.04469	0.082021	0.999816	1697	1
HOXA7	5	1.34961	0.044709	0.091122	0.999816	1698	2
MAP3K8	5	1.34916	0.044755	0.091185	0.999816	1699	2
ZNF585A	5	1.34904	0.044767	0.091201	0.999816	1700	2
BSPRY	5	1.34901	0.04477	0.091206	0.999816	1701	1
TRIM47	5	1.34855	0.044818	0.091273	0.999816	1702	2
GPR33	5	1.34837	0.044836	0.091297	0.999816	1703	2
SLC18A2	5	1.34738	0.044939	0.091446	0.999816	1704	2
HES6	5	1.34715	0.044962	0.091474	0.999816	1705	2
NTRK1	5	1.34669	0.04501	0.091553	0.999816	1706	1
GPRASP2	5	1.34582	0.0451	0.091685	0.999816	1707	2
OR56A5	5	1.34576	0.045107	0.091692	0.999816	1708	2
CNTN6	5	1.34571	0.045112	0.091701	0.999816	1709	2
STRA8	5	1.34438	0.04525	0.091906	0.999816	1710	2
FRMD5	5	1.34345	0.045347	0.092041	0.999816	1711	2
ZBTB38	10	1.34329	0.045364	0.12304	0.999816	1712	4
SHISA8	5	1.34253	0.045443	0.092177	0.999816	1713	1
RGS7BP	4	1.34236	0.045461	0.083161	0.999816	1714	1
MRAS	5	1.34115	0.045588	0.092369	0.999816	1715	2
CAMK1G	10	1.34101	0.045603	0.12362	0.999816	1716	1
PLA2G6	5	1.34069	0.045636	0.092441	0.999816	1717	1
INSC	5	1.34029	0.045678	0.092496	0.999816	1718	2
EYA4	5	1.33978	0.045732	0.092576	0.999816	1719	2
POLR2E	10	1.33965	0.045746	0.12394	0.999816	1720	3
LINGO4	5	1.33941	0.045771	0.092627	0.999816	1721	2
PSMA6	5	1.33932	0.04578	0.092635	0.999816	1722	1
SLPI	5	1.33796	0.045924	0.09284	0.999816	1723	1
ZNF445	5	1.33751	0.045972	0.092893	0.999816	1724	1
MIB2	5	1.33721	0.046003	0.092937	0.999816	1725	2
UGT2B15	7	1.33702	0.046024	0.10701	0.999816	1726	3
TSFM	5	1.3366	0.046068	0.093029	0.999816	1727	1
EGFL8	5	1.33568	0.046166	0.093161	0.999816	1728	2
CNTFR	5	1.33535	0.046201	0.093217	0.999816	1729	2
KRTAP7-1	5	1.33525	0.046212	0.093233	0.999816	1730	2
MDP1	2	1.33499	0.046239	0.062115	0.968958	1731	1
RABL6	5	1.33492	0.046247	0.093282	0.999816	1732	2
HIRIP3	5	1.33388	0.046357	0.093423	0.999816	1733	1
CSMD1	5	1.33372	0.046375	0.093448	0.999816	1734	2
JOSD2	5	1.3336	0.046387	0.093461	0.999816	1735	2
DYNAP	5	1.33344	0.046405	0.093489	0.999816	1736	1
CTHRC1	4	1.33288	0.046464	0.084655	0.999816	1737	1
TMEM194B	4	1.33253	0.046502	0.084708	0.999816	1738	1
IZUMO1	4	1.33149	0.046613	0.084879	0.999816	1739	2
FMNL3	5	1.33119	0.046645	0.093831	0.999816	1740	1
RGS11	5	1.33099	0.046667	0.093856	0.999816	1741	2
OR4K2	5	1.33034	0.046737	0.093958	0.999816	1742	2
AEBP2	5	1.33012	0.046761	0.093986	0.999816	1743	2
NOXO1	5	1.32986	0.046789	0.09403	0.999816	1744	1
NFIX	10	1.3296	0.046817	0.12646	0.999816	1745	4
HIST1H2AE	5	1.32882	0.046901	0.094176	0.999816	1746	2
EIF5B	5	1.32808	0.046981	0.094287	0.999816	1747	1
THEG5	5	1.32763	0.047029	0.094358	0.999816	1748	1
PP2D1	5	1.32763	0.04703	0.094359	0.999816	1749	2
APOBR	10	1.3275	0.047043	0.12698	0.999816	1750	4
KCNC2	5	1.32719	0.047077	0.094418	0.999816	1751	1
RGAG1	10	1.32706	0.047091	0.12709	0.999816	1752	2
PPIE	5	1.32687	0.047112	0.09447	0.999816	1753	2
CD209	5	1.32675	0.047125	0.094492	0.999816	1754	1
OR6C3	5	1.326	0.047206	0.094606	0.999816	1755	2
ERGIC3	5	1.32589	0.047218	0.09462	0.999816	1756	2
GPR88	5	1.32586	0.047221	0.094626	0.999816	1757	1
WDR38	5	1.32542	0.047269	0.094688	0.999816	1758	1
ADARB2	5	1.32454	0.047365	0.09482	0.999816	1759	1
GTF2F1	5	1.32439	0.047382	0.09484	0.999816	1760	2
IL17RD	5	1.32213	0.047629	0.095197	0.999816	1761	2
ZCCHC6	5	1.32191	0.047653	0.095222	0.999816	1762	1
TRAPPC4	5	1.32169	0.047677	0.095259	0.999816	1763	2
CCDC88B	5	1.32147	0.047701	0.095297	0.999816	1764	1
CENPP	5	1.32104	0.047749	0.095371	0.999816	1765	1
AKR7A2	5	1.32084	0.047771	0.095407	0.999816	1766	2
PTGIS	5	1.3206	0.047797	0.095454	0.999816	1767	1
ARHGAP33	5	1.32041	0.047818	0.09549	0.999816	1768	2
ENKUR	5	1.32016	0.047845	0.095535	0.999816	1769	1
CHTF8	5	1.32008	0.047854	0.095545	0.999816	1770	2
ZNF700	4	1.31919	0.047952	0.086896	0.999816	1771	2
ITGA7	10	1.31917	0.047955	0.12908	0.999816	1772	2
C1orf167	5	1.31901	0.047972	0.095719	0.999816	1773	2
ALG9	5	1.31886	0.047989	0.095745	0.999816	1774	2
DNAJC25	5	1.31859	0.048019	0.095793	0.999816	1775	2
LONP2	10	1.31818	0.048064	0.12934	0.999816	1776	3
GBA	10	1.31795	0.048089	0.1294	0.999816	1777	2
KRTAP12-3	5	1.31763	0.048125	0.095953	0.999816	1778	2
HNRNPL	10	1.31742	0.048148	0.12954	0.999816	1779	3
MAT2B	10	1.31676	0.048221	0.12971	0.999816	1780	3
DNAAF2	4	1.31594	0.048312	0.087424	0.999816	1781	1
ZNF845	5	1.31583	0.048325	0.096252	0.999816	1782	2
STAR	5	1.3154	0.048373	0.096307	0.999816	1783	1
LIG1	5	1.31539	0.048374	0.096307	0.999816	1784	2
CRIP1	5	1.31497	0.048421	0.096366	0.999816	1785	2
THEMIS	9	1.31471	0.04845	0.1217	0.999816	1786	3
GRIN1	5	1.31411	0.048517	0.096488	0.999816	1787	2
COG5	6	1.31279	0.048664	0.11101	0.999816	1788	2
MS4A4A	4	1.31244	0.048703	0.087981	0.999816	1789	2
SLC15A2	5	1.31239	0.048709	0.096756	0.999816	1790	1
EID1	5	1.31154	0.048805	0.096909	0.999816	1791	1
ZNF440	5	1.31135	0.048826	0.096939	0.999816	1792	2
NAP1L1	5	1.31111	0.048853	0.096969	0.999816	1793	1
HPGDS	5	1.31029	0.048945	0.097095	0.999816	1794	2
GGPS1	5	1.30983	0.048997	0.097159	0.999816	1795	1
KRTAP6-2	5	1.30941	0.049044	0.097227	0.999816	1796	1
GABRR3	5	1.3086	0.049136	0.097359	0.999816	1797	2
GIMAP7	5	1.30814	0.049188	0.097436	0.999816	1798	1
TTC24	5	1.30772	0.049236	0.097499	0.999816	1799	2
NME4	5	1.30766	0.049243	0.097506	0.999816	1800	2
SAA1	5	1.30687	0.049332	0.097638	0.999816	1801	1
CDH26	5	1.30649	0.049375	0.097687	0.999816	1802	2
TAF1A	5	1.30518	0.049524	0.097914	0.999816	1803	1
RGPD5	6	1.30453	0.049599	0.11215	0.999816	1804	2
AP2M1	10	1.30438	0.049616	0.13286	0.999816	1805	2
WDR53	5	1.30434	0.04962	0.098049	0.999816	1806	1
ZKSCAN7	5	1.30419	0.049638	0.098075	0.999816	1807	2
ZNF484	5	1.30392	0.049668	0.098102	0.999816	1808	1
SRSF3	3	1.30375	0.049688	0.087607	0.999816	1809	2
KRT71	5	1.30351	0.049715	0.098184	0.999816	1810	1
SMPX	5	1.30314	0.049758	0.098241	0.999816	1811	2
NAPA	5	1.30178	0.049914	0.098477	0.999816	1812	2
PNMA1	5	1.30142	0.049955	0.098527	0.999816	1813	1
CUX2	5	1.301	0.050003	0.098593	0.999816	1814	1
SLA2	5	1.30094	0.05001	0.0986	0.999816	1815	2
RAD23B	5	1.30063	0.050046	0.098646	0.999816	1816	2
FCN3	5	1.30059	0.050051	0.098652	0.999816	1817	1
CROT	5	1.30053	0.050058	0.098666	0.999816	1818	2
ARID4B	5	1.29989	0.050131	0.098777	0.999816	1819	2
OR5V1	10	1.29958	0.050167	0.1338	0.999816	1820	3
CCDC179	4	1.29938	0.05019	0.090291	0.999816	1821	2
MED17	5	1.29934	0.050195	0.098864	0.999816	1822	1
PCDH11X	7	1.29865	0.050275	0.11543	0.999816	1823	1
TSNAXIP1	5	1.29854	0.050287	0.098986	0.999816	1824	2
MGME1	5	1.2981	0.050338	0.099061	0.999816	1825	1
DTX3L	5	1.29771	0.050384	0.099123	0.999816	1826	2
SLC7A4	5	1.29709	0.050456	0.099224	0.999816	1827	2
SCN2B	5	1.29667	0.050504	0.099286	0.999816	1828	2
PSMD4	5	1.29666	0.050506	0.099289	0.999816	1829	1
ZXDB	5	1.29636	0.05054	0.099336	0.999816	1830	2
ATR	5	1.29553	0.050637	0.099476	0.999816	1831	2
TBC1D29	9	1.29537	0.050656	0.12548	0.999816	1832	3
TTC40	4	1.29537	0.050656	0.091009	0.999816	1833	2
SYNRG	5	1.29522	0.050673	0.099532	0.999816	1834	1
OR2A25	5	1.29481	0.050721	0.099613	0.999816	1835	1
LRRC1	4	1.29444	0.050764	0.091174	0.999816	1836	2
GARS	5	1.29358	0.050865	0.099814	0.999816	1837	2
CWF19L1	5	1.29326	0.050903	0.099868	0.999816	1838	2
OCM2	5	1.29279	0.050958	0.099937	0.999816	1839	2
LEAP2	5	1.29276	0.050961	0.099941	0.999816	1840	1
OR5T3	5	1.29243	0.051	0.099998	0.999816	1841	2
INSL5	5	1.29235	0.051009	0.10001	0.999816	1842	1
FCGR2C	5	1.29195	0.051056	0.10006	0.999816	1843	1
ZNF85	5	1.29191	0.051061	0.10007	0.999816	1844	2
BTBD17	5	1.29155	0.051104	0.10013	0.999816	1845	1
ZNF197	5	1.29114	0.051152	0.1002	0.999816	1846	1
RGS14	10	1.29074	0.051199	0.13544	0.999816	1847	3
ATF6B	5	1.28996	0.051291	0.1004	0.999816	1848	2
BTD	5	1.28992	0.051296	0.10041	0.999816	1849	1
DHX37	5	1.28954	0.05134	0.10047	0.999816	1850	2
ATP9A	5	1.28951	0.051344	0.10048	0.999816	1851	1
GPR132	5	1.28871	0.051439	0.10062	0.999816	1852	1
TEC	5	1.28841	0.051474	0.10067	0.999816	1853	2
ETV3L	5	1.2883	0.051487	0.10068	0.999816	1854	1
PIN4	5	1.2877	0.051559	0.10078	0.999816	1855	2
KPNA2	5	1.28749	0.051583	0.10082	0.999816	1856	1
LGALSL	5	1.28709	0.051631	0.10088	0.999816	1857	1
SRPK3	5	1.28669	0.051678	0.10095	0.999816	1858	1
ELL	5	1.28667	0.051681	0.10096	0.999816	1859	2
KDM3B	5	1.28616	0.051742	0.10104	0.999816	1860	2
CCT7	3	1.28567	0.0518	0.091089	0.999816	1861	1
DEFB4A	5	1.28565	0.051803	0.10115	0.999816	1862	2
SLC13A4	5	1.28549	0.051822	0.10118	0.999816	1863	1
SF3B1	5	1.28513	0.051864	0.10124	0.999816	1864	2
PRDX3	5	1.28508	0.05187	0.10124	0.999816	1865	1
OTUD4	5	1.28468	0.051918	0.1013	0.999816	1866	1
TIFA	4	1.28464	0.051923	0.092922	0.999816	1867	1
ZNF568	5	1.28429	0.051965	0.10136	0.999816	1868	2
GRIA4	5	1.28389	0.052013	0.10142	0.999816	1869	1
TMEM180	5	1.2836	0.052047	0.10147	0.999816	1870	2
C19orf57	5	1.283	0.05212	0.10156	0.999816	1871	2
AFG3L2	3	1.28224	0.052211	0.091731	0.999816	1872	2
CRYBA2	5	1.28218	0.052218	0.1017	0.999816	1873	2
TUBA1C	5	1.2819	0.052252	0.10175	0.999816	1874	1
PCBP3	5	1.28187	0.052255	0.10175	0.999816	1875	2
XAF1	5	1.28086	0.052377	0.10192	0.999816	1876	2
PLA2G4C	5	1.27873	0.052635	0.10227	0.999816	1877	2
SF3A3	5	1.27794	0.05273	0.10241	0.999816	1878	1
KRTAP3-3	5	1.27742	0.052794	0.10252	0.999816	1879	2
NLRP6	5	1.27721	0.052819	0.10255	0.999816	1880	2
DCP2	5	1.27711	0.052831	0.10256	0.999816	1881	2
MMAB	6	1.27695	0.052851	0.11634	0.999816	1882	1
OR52W1	5	1.27676	0.052874	0.10263	0.999816	1883	1
CD101	5	1.2763	0.05293	0.1027	0.999816	1884	2
C10orf62	4	1.27607	0.052958	0.094504	0.999816	1885	1
STX19	5	1.27549	0.053028	0.10285	0.999816	1886	2
SYF2	5	1.2754	0.05304	0.10287	0.999816	1887	2
C10orf53	5	1.27519	0.053065	0.10291	0.999816	1888	1
RPL13	4	1.27459	0.053139	0.094771	0.999816	1889	2
CNIH2	8	1.27389	0.053224	0.12393	0.999816	1890	3
CAMK2N2	5	1.27378	0.053238	0.10315	0.999816	1891	2
LRRC49	5	1.27363	0.053256	0.10317	0.999816	1892	1
CUTC	3	1.27326	0.053302	0.093532	0.999816	1893	1
ZBTB16	5	1.27308	0.053324	0.10326	0.999816	1894	2
DTX2	5	1.27285	0.053352	0.10331	0.999816	1895	2
GTF2H4	5	1.27208	0.053447	0.10344	0.999816	1896	2
CHRNA5	5	1.2713	0.053543	0.10357	0.999816	1897	1
C10orf71	5	1.27097	0.053583	0.10363	0.999816	1898	2
GPR101	5	1.27092	0.05359	0.10364	0.999816	1899	1
LRCH4	10	1.27069	0.053618	0.13938	0.999816	1900	2
ZNF205	5	1.27014	0.053686	0.10379	0.999816	1901	1
USP4	5	1.26997	0.053707	0.10382	0.999816	1902	2
TRMT2B	5	1.26975	0.053734	0.10386	0.999816	1903	2
ACSM1	5	1.26937	0.053781	0.10394	0.999816	1904	1
ELAVL1	5	1.26907	0.053818	0.10398	0.999816	1905	2
PSME1	5	1.26867	0.053868	0.10405	0.999816	1906	2
DDX5	5	1.26837	0.053905	0.10411	0.999816	1907	2
CBX3	5	1.26821	0.053925	0.10414	0.999816	1908	1
TMEM41B	4	1.26811	0.053938	0.096049	0.999816	1909	2
OR10H5	5	1.26777	0.05398	0.10422	0.999816	1910	2
ETNK1	5	1.26757	0.054004	0.10425	0.999816	1911	2
CCDC176	5	1.26745	0.05402	0.10427	0.999816	1912	1
DNMT3B	10	1.26744	0.054021	0.14004	0.999816	1913	2
ELF5	5	1.26717	0.054054	0.10432	0.999816	1914	2
UGT2B17	3	1.26695	0.054082	0.094785	0.999816	1915	2
GZMK	5	1.26667	0.054116	0.10441	0.999816	1916	2
CXCR4	5	1.26658	0.054128	0.10442	0.999816	1917	2
LMNB2	5	1.2663	0.054163	0.10446	0.999816	1918	1
IL18RAP	10	1.26614	0.054183	0.1403	0.999816	1919	2
ATP1A3	5	1.26558	0.054253	0.1046	0.999816	1920	2
CYB5B	5	1.26514	0.054307	0.10468	0.999816	1921	1
FAM203A	5	1.26508	0.054315	0.10469	0.999816	1922	2
FAT1	10	1.26462	0.054373	0.14059	0.999816	1923	1
MYNN	5	1.26439	0.054402	0.10481	0.999816	1924	1
VHLL	5	1.26389	0.054464	0.10491	0.999816	1925	2
ATP5J	5	1.2636	0.054501	0.10496	0.999816	1926	2
TWIST1	5	1.26325	0.054545	0.10503	0.999816	1927	1
IL17A	5	1.26286	0.054593	0.1051	0.999816	1928	2
METTL4	5	1.2627	0.054613	0.10512	0.999816	1929	2
ABCC3	5	1.26251	0.054638	0.10516	0.999816	1930	2
HIST1H2AD	5	1.26248	0.054641	0.10516	0.999816	1931	1
PCGF5	7	1.26218	0.054679	0.12414	0.999816	1932	1
STAU2	5	1.26135	0.054784	0.10535	0.999816	1933	2
FBP1	5	1.26102	0.054825	0.10542	0.999816	1934	2
NCOR2	5	1.26072	0.054863	0.10548	0.999816	1935	2
FOLR2	5	1.26063	0.054875	0.1055	0.999816	1936	2
GTF2A1	5	1.26059	0.054879	0.10551	0.999816	1937	1
DBF4B	4	1.26033	0.054912	0.097527	0.999816	1938	1
ANK1	5	1.26032	0.054913	0.10555	0.999816	1939	2
RSRC2	5	1.26021	0.054927	0.10557	0.999816	1940	1
C2orf73	5	1.25983	0.054975	0.10565	0.999816	1941	2
NUP205	4	1.25942	0.055027	0.097686	0.999816	1942	1
OR5K4	5	1.25855	0.055138	0.10589	0.999816	1943	2
BCL3	5	1.25758	0.055261	0.10606	0.999816	1944	1
HMGN5	5	1.25721	0.055308	0.10613	0.999816	1945	1
ZBTB3	5	1.25684	0.055356	0.10621	0.999816	1946	1
LBX2	5	1.25608	0.055452	0.10633	0.999816	1947	1
MAP1B	5	1.25589	0.055476	0.10638	0.999816	1948	2
GMNC	5	1.25496	0.055595	0.10656	0.999816	1949	1
C17orf58	5	1.2546	0.055642	0.10663	0.999816	1950	1
DCLRE1A	5	1.25443	0.055664	0.10666	0.999816	1951	2
ATAD3C	5	1.25432	0.055677	0.10669	0.999816	1952	2
MTNR1B	5	1.25385	0.055738	0.10676	0.999816	1953	2
MAFF	5	1.25348	0.055785	0.10682	0.999816	1954	1
KRT27	5	1.25325	0.055815	0.10685	0.999816	1955	2
LYPD2	5	1.25286	0.055865	0.10692	0.999816	1956	2
STAU1	5	1.25276	0.055878	0.10695	0.999816	1957	2
ADAMTSL4	5	1.25274	0.055881	0.10695	0.999816	1958	2
QSER1	5	1.25227	0.055941	0.10703	0.999816	1959	2
ZDHHC6	5	1.252	0.055976	0.10707	0.999816	1960	1
ORAI1	4	1.25167	0.056018	0.099178	0.999816	1961	2
AKAP10	5	1.25163	0.056024	0.10714	0.999816	1962	1
APOA1	5	1.25126	0.056071	0.10721	0.999816	1963	1
ARF3	5	1.25091	0.056117	0.10727	0.999816	1964	2
CRELD1	5	1.25052	0.056167	0.10734	0.999816	1965	1
CDH3	5	1.25042	0.05618	0.10736	0.999816	1966	2
COQ2	5	1.25016	0.056214	0.1074	0.999816	1967	1
SLC35G3	5	1.24983	0.056256	0.10747	0.999816	1968	2
TNFSF9	5	1.24978	0.056262	0.10748	0.999816	1969	2
CMIP	5	1.24955	0.056293	0.10752	0.999816	1970	2
ENPP4	5	1.24935	0.056319	0.10756	0.999816	1971	2
CD44	5	1.24906	0.056356	0.10761	0.999816	1972	2
GALNT7	5	1.24905	0.056357	0.10761	0.999816	1973	1
TRIM39-RPP21	4	1.24889	0.056378	0.099744	0.999816	1974	2
MAGEA11	10	1.24765	0.056539	0.14407	0.999816	1975	2
ESD	5	1.24701	0.056622	0.10798	0.999816	1976	2
TTF2	5	1.24692	0.056634	0.108	0.999816	1977	2
RPL36A	5	1.24685	0.056643	0.10801	0.999816	1978	1
CCL13	4	1.24605	0.056748	0.1003	0.999816	1979	1
PCBP2	11	1.24551	0.056819	0.14909	0.999816	1980	4
RARS	5	1.24539	0.056834	0.10827	0.999816	1981	2
LMOD2	5	1.24479	0.056913	0.10837	0.999816	1982	2
TEKT2	5	1.2446	0.056938	0.1084	0.999816	1983	2
RHBDD1	5	1.24431	0.056976	0.10846	0.999816	1984	1
ATP8A2	5	1.24402	0.057014	0.10852	0.999816	1985	2
UBD	5	1.24394	0.057024	0.10853	0.999816	1986	1
GRK6	5	1.24322	0.057119	0.10866	0.999816	1987	2
GLOD4	5	1.24285	0.057167	0.10873	0.999816	1988	2
RRAS2	5	1.24257	0.057204	0.10878	0.999816	1989	2
OR2T27	4	1.24256	0.057206	0.10097	0.999816	1990	1
MTIF3	5	1.24238	0.05723	0.10882	0.999816	1991	2
FN3K	5	1.24213	0.057262	0.10886	0.999816	1992	2
GPATCH2	5	1.2419	0.057293	0.1089	0.999816	1993	2
TNFRSF1A	5	1.24161	0.057331	0.10895	0.999816	1994	2
PRKACB	5	1.24122	0.057382	0.10902	0.999816	1995	2
CDCA5	4	1.24107	0.057403	0.10126	0.999816	1996	2
PPFIA2	10	1.24104	0.057406	0.14544	0.999816	1997	2
SIGLEC5	5	1.24103	0.057408	0.10905	0.999816	1998	2
GPANK1	4	1.24054	0.057473	0.10137	0.999816	1999	1
[truncated: 1,046,576+ more rows]
